# Supplementary material for: BioInstaller: a comprehensive R package to construct interactive and reproducible biological data analysis applications based on the R platform
Source: PeerJ journal article supplement (doi:10.7717/peerj.5853), 2018-10-31
Supplement: Figure_S2_shiny_dashbord_upload.pdf [file Figure_S2_shiny_dashbord_upload.pdf]

**A** Bioinstaller Shiny APP

Search...

- Introduction
- Dashboard
- Upload
- File Viewer
- Pipeline
- Instant
- Installer
- Setting
- Source code for app

## Introduction

### BioInstaller

build passing CRAN 0.3.3 downloads 368/month codecov 69%



**Introduction**

BioInstaller is a comprehensive R package to manage bioinformatics software/script and database based on the R, Shiny web application and the GitHub forum. Hundreds of bioinformatics tool/script and database has been included in BioInstaller.

**Feature:**

- Easy-to-use
- User-friendly Shiny application
- Integrative platform of Databases and bioinformatics resources
- Open source and completely free
- One-click to download and install bioinformatics resources (via R, Shiny or Opencpu REST APIs)
- More attention for those software and database resource that have not been by other tools
- Logging
- System monitor
- Task submitting system
- Parallel tasks

**Field**

- Quality Control
- Alignment And Assembly
- Alternative Splicing
- ChIP-seq analysis
- Gene Expression Data Analysis
- Variant Detection
- Variant Annotation

**B**

### Status of system

Disk capacity: 81% (188.11GB/233.47GB)

Memory capacity: 150.3MB / 16GB

Running tasks: No task

### Task table query

Key: Bioinstaller\_admin

Query

### Session info of R service

### Installed packages of R service

### Environment variables of R service

### Files in the PATH

**C**

### Files in the PATH

Copy CSV Excel PDF Print Search:

| files              | size   | isdir | mtime                | ctime                |
|--------------------|--------|-------|----------------------|----------------------|
| /usr/bin/2to3-     | 925    | false | 2017-07-16T00:20:59Z | 2017-12-01T22:44:20Z |
| /usr/bin/2to3-2.7  | 288    | false | 2017-07-16T00:20:59Z | 2017-12-01T22:39:35Z |
| /usr/bin/a2p       | 66608  | false | 2018-07-04T11:02:25Z | 2018-07-10T15:26:02Z |
| /usr/bin/a2p5.18   | 230000 | false | 2018-07-04T11:02:36Z | 2018-07-10T15:26:02Z |
| /usr/bin/addftinfo | 33808  | false | 2017-12-01T19:39:08Z | 2017-12-01T22:44:16Z |

Show 5 entries of 1,823 entries

Previous 1 2 3 4 5 ... 365 Next

**D**

### Upload

Choose Need Uploaded File

Browse... No file selected

FileType: auto

GenomeVersion: hg19

Description

Save

**E**

### Upload

Choose Need Uploaded File

Browse... dat.txt Upload complete

FileType: txt

GenomeVersion: hg19

Description



**Upload and update database successful!**

OK

Save

**F**

### Preview

Copy CSV Excel PDF Print Search:

|    | date     | EMS | neonatal | infant | kid | child | adolescent |
|----|----------|-----|----------|--------|-----|-------|------------|
| 1  | 20160101 | 426 | 0        | 0      | 7   | 0     | 6          |
| 2  | 20160102 | 424 | 0        | 1      | 4   | 1     | 4          |
| 3  | 20160103 | 393 | 0        | 1      | 0   | 1     | 0          |
| 4  | 20160104 | 420 | 0        | 0      | 1   | 0     | 3          |
| 5  | 20160105 | 397 | 0        | 2      | 3   | 0     | 1          |
| 6  | 20160106 | 431 | 0        | 0      | 7   | 0     | 5          |
| 7  | 20160107 | 452 | 0        | 0      | 5   | 3     | 3          |
| 8  | 20160108 | 431 | 0        | 0      | 1   | 1     | 6          |
| 9  | 20160109 | 404 | 0        | 2      | 3   | 0     | 2          |
| 10 | 20160110 | 395 | 0        | 0      | 2   | 1     | 1          |

Show 10 entries

Showing 1 to 10 of 366 entries Previous 1 2 3 4 5 ... 37 Next

/var/folders/nc/y5qhkn6vxf.m7s.yz2kzv0000gn/T//Rtmp7zc31/3db838c58118f1dac9bc0181/0.txt
