# Supplementary material for: BioInstaller: a comprehensive R package to construct interactive and reproducible biological data analysis applications based on the R platform
Source: PeerJ journal article supplement (doi:10.7717/peerj.5853), 2018-10-31
Supplement: Figure_S3_shiny_dashbord_others.pdf [file Figure_S3_shiny_dashbord_others.pdf]

## A Session info of R service

```
R version 3.5.0 (2018-04-23)
Platform: x86_64-apple-darwin15.6.0 (64-bit)
Running under: macOS High Sierra 10.13.16

Matrix products: default
BLAS: /System/Library/Frameworks/Accelerate.framework/Versions/A/Frameworks/vecLib.framework/Versions/A/LIBBLAS.dylib
LAPACK: /Library/Frameworks/R.framework/Versions/3.5/Resources/lib/libRlapack.dylib

locale:
 [1] en_US.UTF-8/en_US.UTF-8/en_US.UTF-8/C/en_US.UTF-8/en_US.UTF-8

attached base packages:
[1] stats      graphics  grDevices  utils      datasets  methods   base

other attached packages:
 [1] stringr_1.3.1      benchmark_0.6.0   ggplot2_2.2.1.9000 DT_0.4        liteq_1.0.1
 [6] shinyjs_1.3.0      data.table_1.11.4 config_0.3.3     shinydashboard_0.7.0 Cairo_1.5-9
 [11] shinyloaders_0.2.0 shiny_1.1.0

loaded via a namespace (and not attached):
 [1] httr_1.3.1          bit64_0.9-7       forcats_0.4.1     foreach_1.4.4    R.utils_2.6.0
 [6] assertthat_0.2.0  blob_1.1.1        yaml_2.1.19       pillar_1.2.3     RSQLite_2.1.1
 [11] lattice_0.20-35   glue_1.2.0        digest_0.6.15     promises_1.0.1   rvest_0.3.2
 [16] rlangspace_1.3-2  httrtools_0.3.6  httpuv_1.4.4.1    Matrix_1.2-14    R.oo_1.22.0
 [21] plyr_1.8.4        devtools_1.13.6  pkgconfig_2.0.1  purrr_0.2.5      xtable_1.0-2
 [26] scales_0.5.0.9000 later_0.7.3       git2r_0.21.0.9002 tibble_1.4.2     withr_1.2.2
 [31] RcppTOML_0.1.3    lazyeval_0.2.1   magrittr_1.5      mime_0.5          memoise_1.1.0
 [36] R.methods53_1.7.1 doParallel_1.0.11 xm2_1.2.0         rsocket_0.8.8    tools_3.5.0
 [41] formatR_1.5       BioInstaller_0.3.3.3 munsell_0.5.0     lambda_r_1.2.3  bindrcpp_0.2.2
 [46] compiler_3.5.0   rlang_0.2.1      futile.logger_1.4.3 grid_3.5.0       Rcurl_1.95-4.10
 [51] iterators_1.0.9  rappdirs_0.3.1  htmlwidgets_1.2  crosstalk_1.0.5 bitops_1.0-6
 [56] gtable_0.2.0     codetools_0.2-15 DBI_1.0.8         markdown_0.8     benchr_kmeData_0.5.1
 [61] R6_2.2.2         inst_0.3.1       dplyr_0.7.5      bit_1.1-14       binder_0.1.1
 [66] futile.options_1.0.1 stringi_1.2.3    parallel_3.5.0   Rcpp_0.12.17    tidyselect_0.2.4
```

## C Environment variables of R service

| var                        | value                                                                                                                        |
|----------------------------|------------------------------------------------------------------------------------------------------------------------------|
| ...CF_USER_TEXT_ENCODING   | 0x1F5:0x0:0x0                                                                                                                |
| Apple_PubSub_Socket_Render | /private/tmp/com.apple.launchd.ljR0IKoCUNs/Render                                                                            |
| CLICOLOR_FORCE             | 1                                                                                                                            |
| DISPLAY                    | /private/tmp/com.apple.launchd.cEgqYqVq/org.macosforge.xquartz:0                                                             |
| DWLD_FALLBACK_LIBRARY_PATH | /Library/Frameworks/R.framework/Resources/lib:/Users/jjf/lib:/usr/local/lib:/usr/lib:/lib:/Library/Java/JavaVirtualMachines/ |

Show 5 entries

Showing 1 to 5 of 57 entries

## E Installed items (Bioinstaller)

| item_name | installed | source.dir                           | bin_dir                              | execut |
|-----------|-----------|--------------------------------------|--------------------------------------|--------|
| bwa       | true      | /Users/jjf/Bioinstaller/download/bwa | /Users/jjf/Bioinstaller/download/bwa |        |

Show 5 entries

Showing 1 to 1 of 1 entries

## B Installed packages of R service

| Package      | LibPath                                                        | Version | Priority | Depends                                      |
|--------------|----------------------------------------------------------------|---------|----------|----------------------------------------------|
| abind        | /Library/Frameworks/R.framework/Versions/3.5/Resources/library | 1.4-5   |          | R (>= 1.5.0)                                 |
| acepack      | /Library/Frameworks/R.framework/Versions/3.5/Resources/library | 1.4.1   |          |                                              |
| ade4         | /Library/Frameworks/R.framework/Versions/3.5/Resources/library | 1.7-11  |          | R (>= 2.10)                                  |
| adehabitatMA | /Library/Frameworks/R.framework/Versions/3.5/Resources/library | 0.3.12  |          | R (>= 2.10.0), sp, methods                   |
| annotate     | /Library/Frameworks/R.framework/Versions/3.5/Resources/library | 1.58.0  |          | R (>= 3.0.0), AnnotationDbi (>= 1.27.5), XML |

Show 5 entries

Showing 1 to 5 of 497 entries

## D Installed items in environment (conda)

| env_name | env_path                               | Name            | Version    | Build          |
|----------|----------------------------------------|-----------------|------------|----------------|
| base     | /Users/jjf/Bioinfo/miniconda3          | asn1crypto      | 0.24.0     | py36_0         |
| ml       | /Users/jjf/Bioinfo/miniconda3/envs/ml  | ca-certificates | 2017.08.26 | h4e5d58_0      |
| rop      | /Users/jjf/Bioinfo/miniconda3/envs/rop | certifi         | 2018.1.18  | py36_0         |
| vep      | /Users/jjf/Bioinfo/miniconda3/envs/vep | cffi            | 1.11.4     | py36h342beff_0 |
|          |                                        | chardet         | 3.0.4      | py36h96c241c_1 |

Show 5 entries

Showing 1 to 6 of 42 entries

## F Installed items (spack)

```
-- darwin-highsierra-x86_64 / clang10.0.0-apple -----
libsigsegv@2.11
```
