# Supplementary material for: BioInstaller: a comprehensive R package to construct interactive and reproducible biological data analysis applications based on the R platform
Source: PeerJ journal article supplement (doi:10.7717/peerj.5853), 2018-10-31
Supplement: Figure_S4_installer.pdf [file Figure_S4_installer.pdf]

### A BioInstaller

**Name of item**

**Version of item**

**Buildver version (Database needed, e.g. hg19, hg38)**

**Download directory (Hints)**

**Download directory**

**GitHub Configuration File**

**Other Configuration File**





**License**

**Logical Values**

Download only

Save the installation info

Overwrite the installation dir

**Extra parameters**

### E spack

**Sub command of spack**

**Parameters**

```

@@CMD:@@ BioInstaller::spack
@@Params:@@
$suffix_params
[1] "install zlib"

==> Installing zlib
==> Fetching http://zlib.net/fossils/zlib-1.2.11.tar.gz
==> Staging archive: /Users/ljf/Bioinfo/spack/var/spack/stage/zlib-1.2.11-caosjr5fcruvzyocttnqqkpackpwyzp/zlib-1.2.11.tar.gz
==> Created stage in /Users/ljf/Bioinfo/spack/var/spack/stage/zlib-1.2.11-caosjr5fcruvzyocttnqqkpackpwyzp
==> No patches needed for zlib
==> Building zlib [Package]
==> Executing phase: 'install'
==> Successfully installed zlib
Fetch: 21.75s. Build: 3.81s. Total: 25.57s.
[+] /Users/ljf/spack/opt/darwin-highsierra-x86_64/c lang-10.0.0-apple/zlib-1.2.11-caosjr5fcruvzyocttnqqkpackpwyzp

```

### B Status of system

Disk capacity

Memory capacity

Running tasks

```

Loading required package: BioInstaller
INFO [2018-08-03 22:07:11] Debug:name:@@_ucsc_refgene
INFO [2018-08-03 22:07:11] Debug:destdir:
INFO [2018-08-03 22:07:11] Debug:dir:/usr/local/share/perl5/perl5pkgsdev/perl5_22x040000p/11/Rlib/MS5CV/BioInstaller
INFO [2018-08-03 22:07:11] Debug:github.cfg:/Library/Frameworks/R.framework/Versions/3.5/Resources/library/BioInstaller/extdata/config/github/github.ton
INFO [2018-08-03 22:07:11] Debug:nongithub.cfg:/Library/Frameworks/R.framework/Versions/3.5/Resources/library/BioInstaller/extdata/config/nongithub/nongit
h.ton
INFO [2018-08-03 22:07:11] Debug:nongithub.cfg:/Library/Frameworks/R.framework/Versions/3.5/Resources/library/BioInstaller/extdata/config/db/db_m.in.ton
INFO [2018-08-03 22:07:11] Debug:nongithub.cfg:/Library/Frameworks/R.framework/Versions/3.5/Resources/library/BioInstaller/extdata/config/db/db_ar.in.ton
INFO [2018-08-03 22:07:11] Debug:nongithub.cfg:/Library/Frameworks/R.framework/Versions/3.5/Resources/library/BioInstaller/extdata/config/db/db_bi.in.ton
INFO [2018-08-03 22:07:12] Install:versions:refgene
INFO [2018-08-03 22:07:12] Now start to install @_ucsc_refgene in /Users/ljf/BioInstaller/download.
INFO [2018-08-03 22:07:12] Running before install steps:
INFO [2018-08-03 22:07:12] Now start to download @_ucsc_refgene in /Users/ljf/BioInstaller/download.
trying URL 'http://hgdownload.cse.ucsc.edu/goldenPath/hg19/database/refgene.txt.gz'
Content-type: 'application/gzip' length 600029 bytes (6.7 MB)
*****

```

### C Conda

**Conda subcommands**

**Conda environment**

**Conda parameters**

```

----- ~/BioInstaller/log/3BzNcg1jda0901EzHvUHLv5Q6rhZLL7CgBMj0geh06a1fWq6u.log
@@Task start at: 2018-08-16 17:38:04
@@Worker nodename: @ macos
@@Worker user: @ ljf
@@Worker locale: @ C.UTF-8/C/C/C/C
@@Worker PID: @ 79667
2018-08-16 17:38:04 Running R command for key 3BzNcg1jda0901EzHvUHLv5Q6rhZLL7CgBMj0geh06a1fWq6u
@@CMD:@@ supply(req_pkgs, function(x){require(x, character.only = TRUE)})
Loading required package: BioInstaller
@@CMD:@@ BioInstaller::conda
@@Params:@@
$prefix_params
[1] "source activate base;"

$suffix_params
[1] "create -n test_env_from_BioInstaller -y"

Solving environment: ..working... done

## Package Plan ##

environment location: /Users/ljf/Bioinfo/miniconda3/envs/test_env_from_BioInstaller

Preparing transaction: ..working... done
Verifying transaction: ..working... done
Executing transaction: ..working... done
#
# # To activate this environment, use
# #
# $ conda activate test_env_from_BioInstaller
#
# # To deactivate an active environment, use
# #
# $ conda deactivate

```

```

@@CMD:@@ BioInstaller::spack
@@Params:@@
$suffix_params
[1] "install zlib"

==> Installing zlib
==> Fetching http://zlib.net/fossils/zlib-1.2.11.tar.gz
==> Staging archive: /Users/ljf/Bioinfo/spack/var/spack/stage/zlib-1.2.11-caosjr5fcruvzyocttnqqkpackpwyzp/zlib-1.2.11.tar.gz
==> Created stage in /Users/ljf/Bioinfo/spack/var/spack/stage/zlib-1.2.11-caosjr5fcruvzyocttnqqkpackpwyzp
==> No patches needed for zlib
==> Building zlib [Package]
==> Executing phase: 'install'
==> Successfully installed zlib
Fetch: 21.75s. Build: 3.81s. Total: 25.57s.
[+] /Users/ljf/spack/opt/darwin-highsierra-x86_64/c lang-10.0.0-apple/zlib-1.2.11-caosjr5fcruvzyocttnqqkpackpwyzp

```
