# Supplementary material for: BioInstaller: a comprehensive R package to construct interactive and reproducible biological data analysis applications based on the R platform
Source: PeerJ journal article supplement (doi:10.7717/peerj.5853), 2018-10-31
Supplement: Figure_S5_setting.pdf [file Figure_S5_setting.pdf]

A

Default **YAML**

### Setting

**shiny\_db**

**db\_path**

**db\_type**

**shiny\_db\_table**

**output\_file\_table\_name**

**task\_table\_admin\_key**

**task\_table\_name**

**upload\_data\_table\_colnames**

**upload\_data\_table\_name**

**user\_table\_name**

**user\_table\_colnames**

**shiny\_plugins**

**shiny\_plugins\_dir**

**upload\_dir**

**supported\_genome\_version**

**supported\_file\_type**

**Update**

B

Default **YAML**

### Setting (YAML)

**BioInstaller YAML**

```

1 shiny_db:
2   db_path: ~/BioInstaller/BioInstaller.shiny.sqlite
3   db_type: sqlite
4 shiny_db_table:
5   output_file_table_name: output_files
6   task_table_admin_key: BioInstaller_admin
7   task_table_name: task_info
8   upload_data_table_colnames:
9     - file_name
10    - file_path
11    - file_size
12    - file_type
13    - genome_version
14    - upload_time
15    - md5

```

**Update**
