# Supplementary material for: BioInstaller: a comprehensive R package to construct interactive and reproducible biological data analysis applications based on the R platform
Source: PeerJ journal article supplement (doi:10.7717/peerj.5853), 2018-10-31
Supplement: Figure_S6_github_forum.pdf [file Figure_S6_github_forum.pdf]

**A**

GitHub search results for 'rna' in a repository. The search bar shows 'rna' and 'In this repository'. Below the search bar, a list of repositories is displayed, including 'bernatgel/karyoploter', 'ShixiangWang/Variants2Neoantigen', 'transcript/samsa2', 'Miachol/Writing-material', 'dianbaer/anyupload', 'lyysi3m/osx-terminal-themes', and 'faressoft/terminalizer'. A search bar at the bottom of the list also shows 'rna' and 'All GitHub'.

**B**

GitHub search results for 'rna' in a repository. The search bar shows 'rna' and 'In this repository'. Below the search bar, a list of repositories is displayed, including 'bernatgel/karyoploter', 'ShixiangWang/Variants2Neoantigen', 'transcript/samsa2', 'Miachol/Writing-material', 'dianbaer/anyupload', 'lyysi3m/osx-terminal-themes', and 'faressoft/terminalizer'. A search bar at the bottom of the list also shows 'rna' and 'All GitHub'. To the right, a sidebar shows search statistics: Code (9), Commits, Issues (1), Wikis, and Languages (TOML: 6, Markdown: 2). Below the sidebar, two code snippets are shown. The first snippet is from 'inst/extdata/config/db/db\_main.toml' and shows configuration for 'db\_cscd'. The second snippet is from 'inst/extdata/config/github/github\_meta.toml' and shows configuration for 'a project-oriented pipeline for processing of RNA-seq data in high performance cluster environments'.

**C** Share bioinformatics database #12

[Edit](#) [New issue](#)

[Open](#) Miachol opened this issue 8 days ago · 17 comments

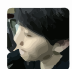

Miachol commented 8 days ago · edited

Member

Assignees

No one—assign yourself

Labels

[Upload](#)

Projects

None yet

Milestone

No milestone

Notifications

[Unsubscribe](#)

You're receiving notifications because you authored the thread.

1 participant

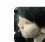

Configuration file: db\_main.toml

Description: miRDB is an online database for miRNA target prediction and functional annotations.

```
[db_mirdb]
source_url = "http://mirdb.org/download/miRDB_v{{version}}_prediction_result.txt.gz"
version_avaliable = ["5.0", "4.0", "3.0", "2.0", "1.0"]
```

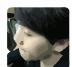

Miachol commented 8 days ago · edited

Member

Configuration file: db\_main.toml

Description: As a database, miRTarBase has accumulated more than three hundred and sixty thousand miRNA-target interactions (MTIs), which are collected by manually surveying pertinent literature after NLP of the text systematically to filter research articles related to functional studies of miRNAs.

```
[db_mirtarbase]
source_url = "http://mirtarbase.mbc.nctu.edu.tw/cache/download/{{version}}/miRTarBase_MTI.x"
version_avaliable = ["7.0"]
```

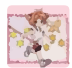

Hellenzz commented a minute ago

[+](#) [😊](#) [⋮](#)

Configuration file: db\_main.toml

Description: HMDB is an online database of small molecule metabolites found in the human body, which facilitates human metabolomics research including the identification and characterization of human metabolites using NMR and MS.

```
[db_hmdb]
source_url = "http://www.hmdb.ca/system/downloads/current/{{version}}.zip"
available_version = ["hmdb_proteins", "hmdb_metabolites", "structures"]
```

[👍](#) 2
