# Supplementary material for: BioInstaller: a comprehensive R package to construct interactive and reproducible biological data analysis applications based on the R platform
Source: PeerJ. 2018 Oct 31;6:e5853. doi: 10.7717/peerj.5853 (PMC6215441; doi:10.7717/peerj.5853)
Supplement: Supplemental Information 12 [file peerj-06-5853-s012.xlsx]

## Sheet: Supp Table 1
Supplementary Table 1. Summary of UCSC sequence and annotation data which BioInstaller supported
UCSC Items	hg18	hg19	hg38
acembly	hg18	hg19
acemblyClass	hg18	hg19
acemblyPep	hg18	hg19
acescan	hg18
affyAllExonProbes	hg18
affyCytoScan		hg19
affyExonProbeAmbiguous		hg19
affyExonProbeCore		hg19
affyExonProbeExtended		hg19
affyExonProbeFree		hg19
affyExonProbeFull		hg19
affyExonProbesetAmbiguous		hg19
affyExonProbesetCore		hg19
affyExonProbesetExtended		hg19
affyExonProbesetFree		hg19
affyExonProbesetFull		hg19
affyExonTissues	hg18
affyExonTissuesGs	hg18
affyExonTissuesGsExps	hg18
affyExonTissuesGsMedian	hg18
affyExonTissuesGsMedianDist	hg18
affyExonTissuesGsMedianExps	hg18
affyGnf1h	hg18	hg19	hg38
affyRatio	hg18
affyTxnPhase3FragsHDF	hg18
affyTxnPhase3FragsHeLaBottomStrand	hg18
affyTxnPhase3FragsHeLaCyto	hg18
affyTxnPhase3FragsHeLaNuclear	hg18
affyTxnPhase3FragsHeLaTopStrand	hg18
affyTxnPhase3FragsHepG2BottomStrand	hg18
affyTxnPhase3FragsHepG2Cyto	hg18
affyTxnPhase3FragsHepG2Nuclear	hg18
affyTxnPhase3FragsHepG2TopStrand	hg18
affyTxnPhase3FragsJurkat	hg18
affyTxnPhase3FragsNCCIT	hg18
affyTxnPhase3FragsPC3	hg18
affyTxnPhase3FragsSK_N_AS	hg18
affyTxnPhase3FragsU87MG	hg18
affyTxnPhase3HDF	hg18
affyTxnPhase3HeLaBottomStrand	hg18
affyTxnPhase3HeLaCyto	hg18
affyTxnPhase3HeLaNuclear	hg18
affyTxnPhase3HeLaTopStrand	hg18
affyTxnPhase3HepG2BottomStrand	hg18
affyTxnPhase3HepG2Cyto	hg18
affyTxnPhase3HepG2Nuclear	hg18
affyTxnPhase3HepG2TopStrand	hg18
affyTxnPhase3Jurkat	hg18
affyTxnPhase3NCCIT	hg18
affyTxnPhase3PC3	hg18
affyTxnPhase3SK_N_AS	hg18
affyTxnPhase3U87MG	hg18
affyU133	hg18	hg19	hg38
affyU133Plus2	hg18	hg19
affyU95	hg18	hg19	hg38
agilentCgh105a	hg18
agilentCgh1x1m	hg18	hg19
agilentCgh1x244k		hg19
agilentCgh244a	hg18
agilentCgh2x105k		hg19
agilentCgh2x400k	hg18	hg19
agilentCgh44k	hg18
agilentCgh4x180k	hg18	hg19
agilentCgh4x44k		hg19
agilentCgh8x60k	hg18	hg19
agilentCghSnp2x400k		hg19
agilentCghSnp4x180k		hg19
agilentCghSnpCancer4x180k		hg19
agilentHrd1x1m	hg18	hg19
all_bacends	hg18	hg19
all_est	hg18	hg19	hg38
all_fosends	hg18	hg19
all_mrna	hg18	hg19	hg38
all_sts_primer	hg18	hg19	hg38
all_sts_seq	hg18	hg19	hg38
allenBrainAli	hg18	hg19
allenBrainGene	hg18	hg19
allenBrainUrl	hg18	hg19
allHg19RS_BW		hg19
altLocations	hg18	hg19	hg38
altSeqHaplotypesP9		hg19
altSeqLiftOverPsl			hg38
altSeqLiftOverPslP11			hg38
altSeqLiftOverPslP13		hg19
altSeqLiftOverPslP3			hg38
altSeqLiftOverPslP6			hg38
altSeqLiftOverPslP9		hg19
augustusAbinitio	hg18
augustusAbinitioPep	hg18
augustusGene		hg19	hg38
augustusHints	hg18
augustusHintsPep	hg18
augustusXRA	hg18
augustusXRAPep	hg18
bacEndPairs	hg18	hg19
bamAll	hg18
bamAllNumtSSorted		hg19
bamFeld1	hg18
bamMez1	hg18
bamMMS10NativeAmerican	hg18
bamMMS11Sardinian	hg18
bamMMS12Melanesian	hg18
bamMMS13Cambodian	hg18
bamMMS14Mongolian	hg18
bamMMS16Papuan	hg18
bamMMS4	hg18
bamMMS5	hg18
bamMMS6	hg18
bamMMS7	hg18
bamMMS8	hg18
bamMMS9MbutiPygmy	hg18
bamSid1253	hg18
bamSLDenisova	hg18
bamSLFeld1	hg18	hg19
bamSLMez1	hg18	hg19
bamSLSid1253	hg18	hg19
bamSLVi33dot16	hg18	hg19
bamSLVi33dot25	hg18	hg19
bamSLVi33dot26	hg18	hg19
bamVi33dot16	hg18
bamVi33dot25	hg18
bamVi33dot26	hg18
bigFiles	hg18	hg19	hg38
bioCycMapDesc	hg18	hg19	hg38
bioCycPathway	hg18	hg19	hg38
blastKGPep04	hg18
blastKGRef04	hg18
burgeRnaSeqGemMapperAlignAdipose	hg18	hg19
burgeRnaSeqGemMapperAlignAdiposeAllRawSignal	hg18	hg19
burgeRnaSeqGemMapperAlignBrain	hg18	hg19
burgeRnaSeqGemMapperAlignBrainAllRawSignal	hg18	hg19
burgeRnaSeqGemMapperAlignBreast	hg18	hg19
burgeRnaSeqGemMapperAlignBreastAllRawSignal	hg18	hg19
burgeRnaSeqGemMapperAlignBT474	hg18	hg19
burgeRnaSeqGemMapperAlignBT474AllRawSignal	hg18	hg19
burgeRnaSeqGemMapperAlignColon	hg18	hg19
burgeRnaSeqGemMapperAlignColonAllRawSignal	hg18	hg19
burgeRnaSeqGemMapperAlignHeart	hg18	hg19
burgeRnaSeqGemMapperAlignHeartAllRawSignal	hg18	hg19
burgeRnaSeqGemMapperAlignHME	hg18	hg19
burgeRnaSeqGemMapperAlignHMEAllRawSignal	hg18	hg19
burgeRnaSeqGemMapperAlignLiver	hg18	hg19
burgeRnaSeqGemMapperAlignLiverAllRawSignal	hg18	hg19
burgeRnaSeqGemMapperAlignLymphNode	hg18	hg19
burgeRnaSeqGemMapperAlignLymphNodeAllRawSignal	hg18	hg19
burgeRnaSeqGemMapperAlignMB435	hg18	hg19
burgeRnaSeqGemMapperAlignMB435AllRawSignal	hg18	hg19
burgeRnaSeqGemMapperAlignMCF7	hg18	hg19
burgeRnaSeqGemMapperAlignMCF7AllRawSignal	hg18	hg19
burgeRnaSeqGemMapperAlignSkelMuscle	hg18	hg19
burgeRnaSeqGemMapperAlignSkelMuscleAllRawSignal	hg18	hg19
burgeRnaSeqGemMapperAlignT47D	hg18	hg19
burgeRnaSeqGemMapperAlignT47DAllRawSignal	hg18	hg19
burgeRnaSeqGemMapperAlignTestes	hg18	hg19
burgeRnaSeqGemMapperAlignTestesAllRawSignal	hg18	hg19
ccdsGene	hg18	hg19	hg38
ccdsInfo	hg18	hg19	hg38
ccdsKgMap	hg18	hg19	hg38
ccdsNotes	hg18	hg19	hg38
ceBlastTab	hg18	hg19	hg38
centromeres			hg38
ceuBcellRNASeq	hg18
ceuBcellRNASeqBW	hg18
cgapAlias	hg18	hg19	hg38
cgapBiocDesc	hg18	hg19	hg38
cgapBiocPathway	hg18	hg19	hg38
cgapSage	hg18	hg19
cgapSageLib	hg18	hg19
chainAilMel1		hg19
chainAilMel1Link		hg19
chainAllMis1		hg19
chainAllMis1Link		hg19
chainAnoCar2		hg19
chainAnoCar2Link		hg19
chainBosTau7		hg19
chainBosTau7Link		hg19
chainBosTau8			hg38
chainBosTau8Link			hg38
chainCalJac3		hg19	hg38
chainCalJac3Link		hg19	hg38
chainCanFam3		hg19	hg38
chainCanFam3Link		hg19	hg38
chainCavPor3		hg19
chainCavPor3Link		hg19
chainCerSim1		hg19
chainCerSim1Link		hg19
chainChlSab2			hg38
chainChlSab2Link			hg38
chainCriGri1		hg19
chainCriGri1Link		hg19
chainCriGriChoV1			hg38
chainCriGriChoV1Link			hg38
chainDanRer11			hg38
chainDanRer11Link			hg38
chainDanRer7		hg19
chainDanRer7Link		hg19
chainDasNov3			hg38
chainDasNov3Link			hg38
chainEchTel2		hg19
chainEchTel2Link		hg19
chainEquCab2		hg19	hg38
chainEquCab2Link		hg19	hg38
chainEriEur2		hg19
chainEriEur2Link		hg19
chainFelCat5		hg19
chainFelCat5Link		hg19
chainFelCat8			hg38
chainFelCat8Link			hg38
chainFr2		hg19
chainFr2Link		hg19
chainGalGal3		hg19
chainGalGal3Link		hg19
chainGalGal5			hg38
chainGalGal5Link			hg38
chainGalVar1			hg38
chainGalVar1Link			hg38
chainGasAcu1		hg19
chainGasAcu1Link		hg19
chainGeoFor1		hg19
chainGeoFor1Link		hg19
chainGorGor3		hg19
chainGorGor3Link		hg19
chainGorGor5			hg38
chainGorGor5Link			hg38
chainHg19Patch13		hg19
chainHg19Patch13Link		hg19
chainHg38Patch11			hg38
chainHg38Patch11Link			hg38
chainLoxAfr3		hg19
chainLoxAfr3Link		hg19
chainMacFas5		hg19	hg38
chainMacFas5Link		hg19	hg38
chainManPen1			hg38
chainManPen1Link			hg38
chainMelGal1		hg19
chainMelGal1Link		hg19
chainMelGal5			hg38
chainMelGal5Link			hg38
chainMicMur2			hg38
chainMicMur2Link			hg38
chainMm10		hg19	hg38
chainMm10Link		hg19	hg38
chainMonDom5		hg19	hg38
chainMonDom5Link		hg19	hg38
chainNasLar1			hg38
chainNasLar1Link			hg38
chainNomLeu3		hg19	hg38
chainNomLeu3Link		hg19	hg38
chainOchPri3		hg19
chainOchPri3Link		hg19
chainOrnAna1		hg19
chainOrnAna1Link		hg19
chainOryCun2		hg19
chainOryCun2Link		hg19
chainOryLat2		hg19
chainOryLat2Link		hg19
chainOtoGar3			hg38
chainOtoGar3Link			hg38
chainOviAri3		hg19
chainOviAri3Link		hg19
chainPanPan2			hg38
chainPanPan2Link			hg38
chainPanTro4		hg19
chainPanTro4Link		hg19
chainPanTro5			hg38
chainPanTro5Link			hg38
chainPetMar2		hg19
chainPetMar2Link		hg19
chainPetMar3			hg38
chainPetMar3Link			hg38
chainPonAbe2		hg19	hg38
chainPonAbe2Link		hg19	hg38
chainRheMac3		hg19
chainRheMac3Link		hg19
chainRheMac8			hg38
chainRheMac8Link			hg38
chainRhiRox1			hg38
chainRhiRox1Link			hg38
chainRn4		hg19
chainRn4Link		hg19
chainRn6			hg38
chainRn6Link			hg38
chainSaiBol1			hg38
chainSaiBol1Link			hg38
chainSarHar1		hg19
chainSarHar1Link		hg19
chainSelf		hg19	hg38
chainSelfLink		hg19	hg38
chainSorAra2		hg19
chainSorAra2Link		hg19
chainSusScr11			hg38
chainSusScr11Link			hg38
chainSusScr2		hg19
chainSusScr2Link		hg19
chainTaeGut2		hg19
chainTaeGut2Link		hg19
chainTarSyr2			hg38
chainTarSyr2Link			hg38
chainTetNig2		hg19
chainTetNig2Link		hg19
chainVicPac2		hg19
chainVicPac2Link		hg19
chainXenLae2			hg38
chainXenLae2Link			hg38
chainXenTro3		hg19
chainXenTro3Link		hg19
chainXenTro9			hg38
chainXenTro9Link			hg38
chr1_chainAnoCar1	hg18
chr1_chainAnoCar1Link	hg18
chr1_chainBosTau4	hg18
chr1_chainBosTau4Link	hg18
chr1_chainBraFlo1	hg18
chr1_chainBraFlo1Link	hg18
chr1_chainCalJac1	hg18
chr1_chainCalJac1Link	hg18
chr1_chainCanFam2	hg18
chr1_chainCanFam2Link	hg18
chr1_chainCavPor3	hg18
chr1_chainCavPor3Link	hg18
chr1_chainDanRer5	hg18
chr1_chainDanRer5Link	hg18
chr1_chainEchTel1	hg18
chr1_chainEchTel1Link	hg18
chr1_chainEquCab1	hg18
chr1_chainEquCab1Link	hg18
chr1_chainFelCat3	hg18
chr1_chainFelCat3Link	hg18
chr1_chainFr2	hg18
chr1_chainFr2Link	hg18
chr1_chainGalGal3	hg18
chr1_chainGalGal3Link	hg18
chr1_chainGasAcu1	hg18
chr1_chainGasAcu1Link	hg18
chr1_chainMm9	hg18
chr1_chainMm9Link	hg18
chr1_chainMonDom4	hg18
chr1_chainMonDom4Link	hg18
chr1_chainOrnAna1	hg18
chr1_chainOrnAna1Link	hg18
chr1_chainOryLat2	hg18
chr1_chainOryLat2Link	hg18
chr1_chainPanTro2	hg18
chr1_chainPanTro2Link	hg18
chr1_chainPetMar1	hg18
chr1_chainPetMar1Link	hg18
chr1_chainPonAbe2	hg18
chr1_chainPonAbe2Link	hg18
chr1_chainRheMac2	hg18
chr1_chainRheMac2Link	hg18
chr1_chainRn4	hg18
chr1_chainRn4Link	hg18
chr1_chainSelf	hg18
chr1_chainSelfLink	hg18
chr1_chainStrPur2	hg18
chr1_chainStrPur2Link	hg18
chr1_chainTaeGut1	hg18
chr1_chainTaeGut1Link	hg18
chr1_chainTetNig1	hg18
chr1_chainTetNig1Link	hg18
chr1_chainXenTro2	hg18
chr1_chainXenTro2Link	hg18
chr1_est	hg18
chr1_gap	hg18
chr1_gl	hg18
chr1_gold	hg18
chr1_intronEst	hg18
chr1_mrna	hg18
chr1_random_chainAnoCar1	hg18
chr1_random_chainAnoCar1Link	hg18
chr1_random_chainBosTau4	hg18
chr1_random_chainBosTau4Link	hg18
chr1_random_chainBraFlo1	hg18
chr1_random_chainBraFlo1Link	hg18
chr1_random_chainCalJac1	hg18
chr1_random_chainCalJac1Link	hg18
chr1_random_chainCanFam2	hg18
chr1_random_chainCanFam2Link	hg18
chr1_random_chainCavPor3	hg18
chr1_random_chainCavPor3Link	hg18
chr1_random_chainDanRer5	hg18
chr1_random_chainDanRer5Link	hg18
chr1_random_chainEchTel1	hg18
chr1_random_chainEchTel1Link	hg18
chr1_random_chainEquCab1	hg18
chr1_random_chainEquCab1Link	hg18
chr1_random_chainFelCat3	hg18
chr1_random_chainFelCat3Link	hg18
chr1_random_chainFr2	hg18
chr1_random_chainFr2Link	hg18
chr1_random_chainGalGal3	hg18
chr1_random_chainGalGal3Link	hg18
chr1_random_chainGasAcu1	hg18
chr1_random_chainGasAcu1Link	hg18
chr1_random_chainMm9	hg18
chr1_random_chainMm9Link	hg18
chr1_random_chainMonDom4	hg18
chr1_random_chainMonDom4Link	hg18
chr1_random_chainOrnAna1	hg18
chr1_random_chainOrnAna1Link	hg18
chr1_random_chainOryLat2	hg18
chr1_random_chainOryLat2Link	hg18
chr1_random_chainPanTro2	hg18
chr1_random_chainPanTro2Link	hg18
chr1_random_chainPetMar1	hg18
chr1_random_chainPetMar1Link	hg18
chr1_random_chainPonAbe2	hg18
chr1_random_chainPonAbe2Link	hg18
chr1_random_chainRheMac2	hg18
chr1_random_chainRheMac2Link	hg18
chr1_random_chainRn4	hg18
chr1_random_chainRn4Link	hg18
chr1_random_chainStrPur2	hg18
chr1_random_chainStrPur2Link	hg18
chr1_random_chainTaeGut1	hg18
chr1_random_chainTaeGut1Link	hg18
chr1_random_chainTetNig1	hg18
chr1_random_chainTetNig1Link	hg18
chr1_random_chainXenTro2	hg18
chr1_random_chainXenTro2Link	hg18
chr1_random_est	hg18
chr1_random_gap	hg18
chr1_random_gl	hg18
chr1_random_gold	hg18
chr1_random_intronEst	hg18
chr1_random_mrna	hg18
chr1_random_rmsk	hg18
chr1_random_rmskRM327	hg18
chr1_rmsk	hg18
chr1_rmskRM327	hg18
chr10_chainAnoCar1	hg18
chr10_chainAnoCar1Link	hg18
chr10_chainBosTau4	hg18
chr10_chainBosTau4Link	hg18
chr10_chainBraFlo1	hg18
chr10_chainBraFlo1Link	hg18
chr10_chainCalJac1	hg18
chr10_chainCalJac1Link	hg18
chr10_chainCanFam2	hg18
chr10_chainCanFam2Link	hg18
chr10_chainCavPor3	hg18
chr10_chainCavPor3Link	hg18
chr10_chainDanRer5	hg18
chr10_chainDanRer5Link	hg18
chr10_chainEchTel1	hg18
chr10_chainEchTel1Link	hg18
chr10_chainEquCab1	hg18
chr10_chainEquCab1Link	hg18
chr10_chainFelCat3	hg18
chr10_chainFelCat3Link	hg18
chr10_chainFr2	hg18
chr10_chainFr2Link	hg18
chr10_chainGalGal3	hg18
chr10_chainGalGal3Link	hg18
chr10_chainGasAcu1	hg18
chr10_chainGasAcu1Link	hg18
chr10_chainMm9	hg18
chr10_chainMm9Link	hg18
chr10_chainMonDom4	hg18
chr10_chainMonDom4Link	hg18
chr10_chainOrnAna1	hg18
chr10_chainOrnAna1Link	hg18
chr10_chainOryLat2	hg18
chr10_chainOryLat2Link	hg18
chr10_chainPanTro2	hg18
chr10_chainPanTro2Link	hg18
chr10_chainPetMar1	hg18
chr10_chainPetMar1Link	hg18
chr10_chainPonAbe2	hg18
chr10_chainPonAbe2Link	hg18
chr10_chainRheMac2	hg18
chr10_chainRheMac2Link	hg18
chr10_chainRn4	hg18
chr10_chainRn4Link	hg18
chr10_chainSelf	hg18
chr10_chainSelfLink	hg18
chr10_chainStrPur2	hg18
chr10_chainStrPur2Link	hg18
chr10_chainTaeGut1	hg18
chr10_chainTaeGut1Link	hg18
chr10_chainTetNig1	hg18
chr10_chainTetNig1Link	hg18
chr10_chainXenTro2	hg18
chr10_chainXenTro2Link	hg18
chr10_est	hg18
chr10_gap	hg18
chr10_gl	hg18
chr10_gold	hg18
chr10_intronEst	hg18
chr10_mrna	hg18
chr10_random_chainAnoCar1	hg18
chr10_random_chainAnoCar1Link	hg18
chr10_random_chainBosTau4	hg18
chr10_random_chainBosTau4Link	hg18
chr10_random_chainBraFlo1	hg18
chr10_random_chainBraFlo1Link	hg18
chr10_random_chainCalJac1	hg18
chr10_random_chainCalJac1Link	hg18
chr10_random_chainCanFam2	hg18
chr10_random_chainCanFam2Link	hg18
chr10_random_chainCavPor3	hg18
chr10_random_chainCavPor3Link	hg18
chr10_random_chainDanRer5	hg18
chr10_random_chainDanRer5Link	hg18
chr10_random_chainEchTel1	hg18
chr10_random_chainEchTel1Link	hg18
chr10_random_chainEquCab1	hg18
chr10_random_chainEquCab1Link	hg18
chr10_random_chainFelCat3	hg18
chr10_random_chainFelCat3Link	hg18
chr10_random_chainFr2	hg18
chr10_random_chainFr2Link	hg18
chr10_random_chainGalGal3	hg18
chr10_random_chainGalGal3Link	hg18
chr10_random_chainGasAcu1	hg18
chr10_random_chainGasAcu1Link	hg18
chr10_random_chainMm9	hg18
chr10_random_chainMm9Link	hg18
chr10_random_chainMonDom4	hg18
chr10_random_chainMonDom4Link	hg18
chr10_random_chainOrnAna1	hg18
chr10_random_chainOrnAna1Link	hg18
chr10_random_chainOryLat2	hg18
chr10_random_chainOryLat2Link	hg18
chr10_random_chainPanTro2	hg18
chr10_random_chainPanTro2Link	hg18
chr10_random_chainPetMar1	hg18
chr10_random_chainPetMar1Link	hg18
chr10_random_chainPonAbe2	hg18
chr10_random_chainPonAbe2Link	hg18
chr10_random_chainRheMac2	hg18
chr10_random_chainRheMac2Link	hg18
chr10_random_chainRn4	hg18
chr10_random_chainRn4Link	hg18
chr10_random_chainStrPur2	hg18
chr10_random_chainStrPur2Link	hg18
chr10_random_chainTaeGut1	hg18
chr10_random_chainTaeGut1Link	hg18
chr10_random_chainTetNig1	hg18
chr10_random_chainTetNig1Link	hg18
chr10_random_chainXenTro2	hg18
chr10_random_chainXenTro2Link	hg18
chr10_random_est	hg18
chr10_random_gap	hg18
chr10_random_gl	hg18
chr10_random_gold	hg18
chr10_random_intronEst	hg18
chr10_random_mrna	hg18
chr10_random_rmsk	hg18
chr10_random_rmskRM327	hg18
chr10_rmsk	hg18
chr10_rmskRM327	hg18
chr11_chainAnoCar1	hg18
chr11_chainAnoCar1Link	hg18
chr11_chainBosTau4	hg18
chr11_chainBosTau4Link	hg18
chr11_chainBraFlo1	hg18
chr11_chainBraFlo1Link	hg18
chr11_chainCalJac1	hg18
chr11_chainCalJac1Link	hg18
chr11_chainCanFam2	hg18
chr11_chainCanFam2Link	hg18
chr11_chainCavPor3	hg18
chr11_chainCavPor3Link	hg18
chr11_chainDanRer5	hg18
chr11_chainDanRer5Link	hg18
chr11_chainEchTel1	hg18
chr11_chainEchTel1Link	hg18
chr11_chainEquCab1	hg18
chr11_chainEquCab1Link	hg18
chr11_chainFelCat3	hg18
chr11_chainFelCat3Link	hg18
chr11_chainFr2	hg18
chr11_chainFr2Link	hg18
chr11_chainGalGal3	hg18
chr11_chainGalGal3Link	hg18
chr11_chainGasAcu1	hg18
chr11_chainGasAcu1Link	hg18
chr11_chainMm9	hg18
chr11_chainMm9Link	hg18
chr11_chainMonDom4	hg18
chr11_chainMonDom4Link	hg18
chr11_chainOrnAna1	hg18
chr11_chainOrnAna1Link	hg18
chr11_chainOryLat2	hg18
chr11_chainOryLat2Link	hg18
chr11_chainPanTro2	hg18
chr11_chainPanTro2Link	hg18
chr11_chainPetMar1	hg18
chr11_chainPetMar1Link	hg18
chr11_chainPonAbe2	hg18
chr11_chainPonAbe2Link	hg18
chr11_chainRheMac2	hg18
chr11_chainRheMac2Link	hg18
chr11_chainRn4	hg18
chr11_chainRn4Link	hg18
chr11_chainSelf	hg18
chr11_chainSelfLink	hg18
chr11_chainStrPur2	hg18
chr11_chainStrPur2Link	hg18
chr11_chainTaeGut1	hg18
chr11_chainTaeGut1Link	hg18
chr11_chainTetNig1	hg18
chr11_chainTetNig1Link	hg18
chr11_chainXenTro2	hg18
chr11_chainXenTro2Link	hg18
chr11_est	hg18
chr11_gap	hg18
chr11_gl	hg18
chr11_gold	hg18
chr11_intronEst	hg18
chr11_mrna	hg18
chr11_random_chainAnoCar1	hg18
chr11_random_chainAnoCar1Link	hg18
chr11_random_chainBosTau4	hg18
chr11_random_chainBosTau4Link	hg18
chr11_random_chainBraFlo1	hg18
chr11_random_chainBraFlo1Link	hg18
chr11_random_chainCalJac1	hg18
chr11_random_chainCalJac1Link	hg18
chr11_random_chainCanFam2	hg18
chr11_random_chainCanFam2Link	hg18
chr11_random_chainCavPor3	hg18
chr11_random_chainCavPor3Link	hg18
chr11_random_chainDanRer5	hg18
chr11_random_chainDanRer5Link	hg18
chr11_random_chainEchTel1	hg18
chr11_random_chainEchTel1Link	hg18
chr11_random_chainEquCab1	hg18
chr11_random_chainEquCab1Link	hg18
chr11_random_chainFelCat3	hg18
chr11_random_chainFelCat3Link	hg18
chr11_random_chainFr2	hg18
chr11_random_chainFr2Link	hg18
chr11_random_chainGalGal3	hg18
chr11_random_chainGalGal3Link	hg18
chr11_random_chainGasAcu1	hg18
chr11_random_chainGasAcu1Link	hg18
chr11_random_chainMm9	hg18
chr11_random_chainMm9Link	hg18
chr11_random_chainMonDom4	hg18
chr11_random_chainMonDom4Link	hg18
chr11_random_chainOrnAna1	hg18
chr11_random_chainOrnAna1Link	hg18
chr11_random_chainOryLat2	hg18
chr11_random_chainOryLat2Link	hg18
chr11_random_chainPanTro2	hg18
chr11_random_chainPanTro2Link	hg18
chr11_random_chainPetMar1	hg18
chr11_random_chainPetMar1Link	hg18
chr11_random_chainPonAbe2	hg18
chr11_random_chainPonAbe2Link	hg18
chr11_random_chainRheMac2	hg18
chr11_random_chainRheMac2Link	hg18
chr11_random_chainRn4	hg18
chr11_random_chainRn4Link	hg18
chr11_random_chainStrPur2	hg18
chr11_random_chainStrPur2Link	hg18
chr11_random_chainTaeGut1	hg18
chr11_random_chainTaeGut1Link	hg18
chr11_random_chainTetNig1	hg18
chr11_random_chainTetNig1Link	hg18
chr11_random_chainXenTro2	hg18
chr11_random_chainXenTro2Link	hg18
chr11_random_est	hg18
chr11_random_gap	hg18
chr11_random_gl	hg18
chr11_random_gold	hg18
chr11_random_intronEst	hg18
chr11_random_mrna	hg18
chr11_random_rmsk	hg18
chr11_random_rmskRM327	hg18
chr11_rmsk	hg18
chr11_rmskRM327	hg18
chr12_chainAnoCar1	hg18
chr12_chainAnoCar1Link	hg18
chr12_chainBosTau4	hg18
chr12_chainBosTau4Link	hg18
chr12_chainBraFlo1	hg18
chr12_chainBraFlo1Link	hg18
chr12_chainCalJac1	hg18
chr12_chainCalJac1Link	hg18
chr12_chainCanFam2	hg18
chr12_chainCanFam2Link	hg18
chr12_chainCavPor3	hg18
chr12_chainCavPor3Link	hg18
chr12_chainDanRer5	hg18
chr12_chainDanRer5Link	hg18
chr12_chainEchTel1	hg18
chr12_chainEchTel1Link	hg18
chr12_chainEquCab1	hg18
chr12_chainEquCab1Link	hg18
chr12_chainFelCat3	hg18
chr12_chainFelCat3Link	hg18
chr12_chainFr2	hg18
chr12_chainFr2Link	hg18
chr12_chainGalGal3	hg18
chr12_chainGalGal3Link	hg18
chr12_chainGasAcu1	hg18
chr12_chainGasAcu1Link	hg18
chr12_chainMm9	hg18
chr12_chainMm9Link	hg18
chr12_chainMonDom4	hg18
chr12_chainMonDom4Link	hg18
chr12_chainOrnAna1	hg18
chr12_chainOrnAna1Link	hg18
chr12_chainOryLat2	hg18
chr12_chainOryLat2Link	hg18
chr12_chainPanTro2	hg18
chr12_chainPanTro2Link	hg18
chr12_chainPetMar1	hg18
chr12_chainPetMar1Link	hg18
chr12_chainPonAbe2	hg18
chr12_chainPonAbe2Link	hg18
chr12_chainRheMac2	hg18
chr12_chainRheMac2Link	hg18
chr12_chainRn4	hg18
chr12_chainRn4Link	hg18
chr12_chainSelf	hg18
chr12_chainSelfLink	hg18
chr12_chainStrPur2	hg18
chr12_chainStrPur2Link	hg18
chr12_chainTaeGut1	hg18
chr12_chainTaeGut1Link	hg18
chr12_chainTetNig1	hg18
chr12_chainTetNig1Link	hg18
chr12_chainXenTro2	hg18
chr12_chainXenTro2Link	hg18
chr12_est	hg18
chr12_gap	hg18
chr12_gl	hg18
chr12_gold	hg18
chr12_intronEst	hg18
chr12_mrna	hg18
chr12_rmsk	hg18
chr12_rmskRM327	hg18
chr13_chainAnoCar1	hg18
chr13_chainAnoCar1Link	hg18
chr13_chainBosTau4	hg18
chr13_chainBosTau4Link	hg18
chr13_chainBraFlo1	hg18
chr13_chainBraFlo1Link	hg18
chr13_chainCalJac1	hg18
chr13_chainCalJac1Link	hg18
chr13_chainCanFam2	hg18
chr13_chainCanFam2Link	hg18
chr13_chainCavPor3	hg18
chr13_chainCavPor3Link	hg18
chr13_chainDanRer5	hg18
chr13_chainDanRer5Link	hg18
chr13_chainEchTel1	hg18
chr13_chainEchTel1Link	hg18
chr13_chainEquCab1	hg18
chr13_chainEquCab1Link	hg18
chr13_chainFelCat3	hg18
chr13_chainFelCat3Link	hg18
chr13_chainFr2	hg18
chr13_chainFr2Link	hg18
chr13_chainGalGal3	hg18
chr13_chainGalGal3Link	hg18
chr13_chainGasAcu1	hg18
chr13_chainGasAcu1Link	hg18
chr13_chainMm9	hg18
chr13_chainMm9Link	hg18
chr13_chainMonDom4	hg18
chr13_chainMonDom4Link	hg18
chr13_chainOrnAna1	hg18
chr13_chainOrnAna1Link	hg18
chr13_chainOryLat2	hg18
chr13_chainOryLat2Link	hg18
chr13_chainPanTro2	hg18
chr13_chainPanTro2Link	hg18
chr13_chainPetMar1	hg18
chr13_chainPetMar1Link	hg18
chr13_chainPonAbe2	hg18
chr13_chainPonAbe2Link	hg18
chr13_chainRheMac2	hg18
chr13_chainRheMac2Link	hg18
chr13_chainRn4	hg18
chr13_chainRn4Link	hg18
chr13_chainSelf	hg18
chr13_chainSelfLink	hg18
chr13_chainStrPur2	hg18
chr13_chainStrPur2Link	hg18
chr13_chainTaeGut1	hg18
chr13_chainTaeGut1Link	hg18
chr13_chainTetNig1	hg18
chr13_chainTetNig1Link	hg18
chr13_chainXenTro2	hg18
chr13_chainXenTro2Link	hg18
chr13_est	hg18
chr13_gap	hg18
chr13_gl	hg18
chr13_gold	hg18
chr13_intronEst	hg18
chr13_mrna	hg18
chr13_random_chainAnoCar1	hg18
chr13_random_chainAnoCar1Link	hg18
chr13_random_chainBosTau4	hg18
chr13_random_chainBosTau4Link	hg18
chr13_random_chainBraFlo1	hg18
chr13_random_chainBraFlo1Link	hg18
chr13_random_chainCalJac1	hg18
chr13_random_chainCalJac1Link	hg18
chr13_random_chainCanFam2	hg18
chr13_random_chainCanFam2Link	hg18
chr13_random_chainCavPor3	hg18
chr13_random_chainCavPor3Link	hg18
chr13_random_chainDanRer5	hg18
chr13_random_chainDanRer5Link	hg18
chr13_random_chainEchTel1	hg18
chr13_random_chainEchTel1Link	hg18
chr13_random_chainEquCab1	hg18
chr13_random_chainEquCab1Link	hg18
chr13_random_chainFelCat3	hg18
chr13_random_chainFelCat3Link	hg18
chr13_random_chainFr2	hg18
chr13_random_chainFr2Link	hg18
chr13_random_chainGalGal3	hg18
chr13_random_chainGalGal3Link	hg18
chr13_random_chainGasAcu1	hg18
chr13_random_chainGasAcu1Link	hg18
chr13_random_chainMm9	hg18
chr13_random_chainMm9Link	hg18
chr13_random_chainMonDom4	hg18
chr13_random_chainMonDom4Link	hg18
chr13_random_chainOrnAna1	hg18
chr13_random_chainOrnAna1Link	hg18
chr13_random_chainOryLat2	hg18
chr13_random_chainOryLat2Link	hg18
chr13_random_chainPanTro2	hg18
chr13_random_chainPanTro2Link	hg18
chr13_random_chainPetMar1	hg18
chr13_random_chainPetMar1Link	hg18
chr13_random_chainPonAbe2	hg18
chr13_random_chainPonAbe2Link	hg18
chr13_random_chainRheMac2	hg18
chr13_random_chainRheMac2Link	hg18
chr13_random_chainRn4	hg18
chr13_random_chainRn4Link	hg18
chr13_random_chainStrPur2	hg18
chr13_random_chainStrPur2Link	hg18
chr13_random_chainTaeGut1	hg18
chr13_random_chainTaeGut1Link	hg18
chr13_random_chainTetNig1	hg18
chr13_random_chainTetNig1Link	hg18
chr13_random_chainXenTro2	hg18
chr13_random_chainXenTro2Link	hg18
chr13_random_est	hg18
chr13_random_gap	hg18
chr13_random_gl	hg18
chr13_random_gold	hg18
chr13_random_intronEst	hg18
chr13_random_mrna	hg18
chr13_random_rmsk	hg18
chr13_random_rmskRM327	hg18
chr13_rmsk	hg18
chr13_rmskRM327	hg18
chr14_chainAnoCar1	hg18
chr14_chainAnoCar1Link	hg18
chr14_chainBosTau4	hg18
chr14_chainBosTau4Link	hg18
chr14_chainBraFlo1	hg18
chr14_chainBraFlo1Link	hg18
chr14_chainCalJac1	hg18
chr14_chainCalJac1Link	hg18
chr14_chainCanFam2	hg18
chr14_chainCanFam2Link	hg18
chr14_chainCavPor3	hg18
chr14_chainCavPor3Link	hg18
chr14_chainDanRer5	hg18
chr14_chainDanRer5Link	hg18
chr14_chainEchTel1	hg18
chr14_chainEchTel1Link	hg18
chr14_chainEquCab1	hg18
chr14_chainEquCab1Link	hg18
chr14_chainFelCat3	hg18
chr14_chainFelCat3Link	hg18
chr14_chainFr2	hg18
chr14_chainFr2Link	hg18
chr14_chainGalGal3	hg18
chr14_chainGalGal3Link	hg18
chr14_chainGasAcu1	hg18
chr14_chainGasAcu1Link	hg18
chr14_chainMm9	hg18
chr14_chainMm9Link	hg18
chr14_chainMonDom4	hg18
chr14_chainMonDom4Link	hg18
chr14_chainOrnAna1	hg18
chr14_chainOrnAna1Link	hg18
chr14_chainOryLat2	hg18
chr14_chainOryLat2Link	hg18
chr14_chainPanTro2	hg18
chr14_chainPanTro2Link	hg18
chr14_chainPetMar1	hg18
chr14_chainPetMar1Link	hg18
chr14_chainPonAbe2	hg18
chr14_chainPonAbe2Link	hg18
chr14_chainRheMac2	hg18
chr14_chainRheMac2Link	hg18
chr14_chainRn4	hg18
chr14_chainRn4Link	hg18
chr14_chainSelf	hg18
chr14_chainSelfLink	hg18
chr14_chainStrPur2	hg18
chr14_chainStrPur2Link	hg18
chr14_chainTaeGut1	hg18
chr14_chainTaeGut1Link	hg18
chr14_chainTetNig1	hg18
chr14_chainTetNig1Link	hg18
chr14_chainXenTro2	hg18
chr14_chainXenTro2Link	hg18
chr14_est	hg18
chr14_gap	hg18
chr14_gl	hg18
chr14_gold	hg18
chr14_intronEst	hg18
chr14_mrna	hg18
chr14_rmsk	hg18
chr14_rmskRM327	hg18
chr15_chainAnoCar1	hg18
chr15_chainAnoCar1Link	hg18
chr15_chainBosTau4	hg18
chr15_chainBosTau4Link	hg18
chr15_chainBraFlo1	hg18
chr15_chainBraFlo1Link	hg18
chr15_chainCalJac1	hg18
chr15_chainCalJac1Link	hg18
chr15_chainCanFam2	hg18
chr15_chainCanFam2Link	hg18
chr15_chainCavPor3	hg18
chr15_chainCavPor3Link	hg18
chr15_chainDanRer5	hg18
chr15_chainDanRer5Link	hg18
chr15_chainEchTel1	hg18
chr15_chainEchTel1Link	hg18
chr15_chainEquCab1	hg18
chr15_chainEquCab1Link	hg18
chr15_chainFelCat3	hg18
chr15_chainFelCat3Link	hg18
chr15_chainFr2	hg18
chr15_chainFr2Link	hg18
chr15_chainGalGal3	hg18
chr15_chainGalGal3Link	hg18
chr15_chainGasAcu1	hg18
chr15_chainGasAcu1Link	hg18
chr15_chainMm9	hg18
chr15_chainMm9Link	hg18
chr15_chainMonDom4	hg18
chr15_chainMonDom4Link	hg18
chr15_chainOrnAna1	hg18
chr15_chainOrnAna1Link	hg18
chr15_chainOryLat2	hg18
chr15_chainOryLat2Link	hg18
chr15_chainPanTro2	hg18
chr15_chainPanTro2Link	hg18
chr15_chainPetMar1	hg18
chr15_chainPetMar1Link	hg18
chr15_chainPonAbe2	hg18
chr15_chainPonAbe2Link	hg18
chr15_chainRheMac2	hg18
chr15_chainRheMac2Link	hg18
chr15_chainRn4	hg18
chr15_chainRn4Link	hg18
chr15_chainSelf	hg18
chr15_chainSelfLink	hg18
chr15_chainStrPur2	hg18
chr15_chainStrPur2Link	hg18
chr15_chainTaeGut1	hg18
chr15_chainTaeGut1Link	hg18
chr15_chainTetNig1	hg18
chr15_chainTetNig1Link	hg18
chr15_chainXenTro2	hg18
chr15_chainXenTro2Link	hg18
chr15_est	hg18
chr15_gap	hg18
chr15_gl	hg18
chr15_gold	hg18
chr15_intronEst	hg18
chr15_mrna	hg18
chr15_random_chainAnoCar1	hg18
chr15_random_chainAnoCar1Link	hg18
chr15_random_chainBosTau4	hg18
chr15_random_chainBosTau4Link	hg18
chr15_random_chainBraFlo1	hg18
chr15_random_chainBraFlo1Link	hg18
chr15_random_chainCalJac1	hg18
chr15_random_chainCalJac1Link	hg18
chr15_random_chainCanFam2	hg18
chr15_random_chainCanFam2Link	hg18
chr15_random_chainCavPor3	hg18
chr15_random_chainCavPor3Link	hg18
chr15_random_chainDanRer5	hg18
chr15_random_chainDanRer5Link	hg18
chr15_random_chainEchTel1	hg18
chr15_random_chainEchTel1Link	hg18
chr15_random_chainEquCab1	hg18
chr15_random_chainEquCab1Link	hg18
chr15_random_chainFelCat3	hg18
chr15_random_chainFelCat3Link	hg18
chr15_random_chainFr2	hg18
chr15_random_chainFr2Link	hg18
chr15_random_chainGalGal3	hg18
chr15_random_chainGalGal3Link	hg18
chr15_random_chainGasAcu1	hg18
chr15_random_chainGasAcu1Link	hg18
chr15_random_chainMm9	hg18
chr15_random_chainMm9Link	hg18
chr15_random_chainMonDom4	hg18
chr15_random_chainMonDom4Link	hg18
chr15_random_chainOrnAna1	hg18
chr15_random_chainOrnAna1Link	hg18
chr15_random_chainOryLat2	hg18
chr15_random_chainOryLat2Link	hg18
chr15_random_chainPanTro2	hg18
chr15_random_chainPanTro2Link	hg18
chr15_random_chainPetMar1	hg18
chr15_random_chainPetMar1Link	hg18
chr15_random_chainPonAbe2	hg18
chr15_random_chainPonAbe2Link	hg18
chr15_random_chainRheMac2	hg18
chr15_random_chainRheMac2Link	hg18
chr15_random_chainRn4	hg18
chr15_random_chainRn4Link	hg18
chr15_random_chainStrPur2	hg18
chr15_random_chainStrPur2Link	hg18
chr15_random_chainTaeGut1	hg18
chr15_random_chainTaeGut1Link	hg18
chr15_random_chainTetNig1	hg18
chr15_random_chainTetNig1Link	hg18
chr15_random_chainXenTro2	hg18
chr15_random_chainXenTro2Link	hg18
chr15_random_est	hg18
chr15_random_gap	hg18
chr15_random_gl	hg18
chr15_random_gold	hg18
chr15_random_intronEst	hg18
chr15_random_mrna	hg18
chr15_random_rmsk	hg18
chr15_random_rmskRM327	hg18
chr15_rmsk	hg18
chr15_rmskRM327	hg18
chr16_chainAnoCar1	hg18
chr16_chainAnoCar1Link	hg18
chr16_chainBosTau4	hg18
chr16_chainBosTau4Link	hg18
chr16_chainBraFlo1	hg18
chr16_chainBraFlo1Link	hg18
chr16_chainCalJac1	hg18
chr16_chainCalJac1Link	hg18
chr16_chainCanFam2	hg18
chr16_chainCanFam2Link	hg18
chr16_chainCavPor3	hg18
chr16_chainCavPor3Link	hg18
chr16_chainDanRer5	hg18
chr16_chainDanRer5Link	hg18
chr16_chainEchTel1	hg18
chr16_chainEchTel1Link	hg18
chr16_chainEquCab1	hg18
chr16_chainEquCab1Link	hg18
chr16_chainFelCat3	hg18
chr16_chainFelCat3Link	hg18
chr16_chainFr2	hg18
chr16_chainFr2Link	hg18
chr16_chainGalGal3	hg18
chr16_chainGalGal3Link	hg18
chr16_chainGasAcu1	hg18
chr16_chainGasAcu1Link	hg18
chr16_chainMm9	hg18
chr16_chainMm9Link	hg18
chr16_chainMonDom4	hg18
chr16_chainMonDom4Link	hg18
chr16_chainOrnAna1	hg18
chr16_chainOrnAna1Link	hg18
chr16_chainOryLat2	hg18
chr16_chainOryLat2Link	hg18
chr16_chainPanTro2	hg18
chr16_chainPanTro2Link	hg18
chr16_chainPetMar1	hg18
chr16_chainPetMar1Link	hg18
chr16_chainPonAbe2	hg18
chr16_chainPonAbe2Link	hg18
chr16_chainRheMac2	hg18
chr16_chainRheMac2Link	hg18
chr16_chainRn4	hg18
chr16_chainRn4Link	hg18
chr16_chainSelf	hg18
chr16_chainSelfLink	hg18
chr16_chainStrPur2	hg18
chr16_chainStrPur2Link	hg18
chr16_chainTaeGut1	hg18
chr16_chainTaeGut1Link	hg18
chr16_chainTetNig1	hg18
chr16_chainTetNig1Link	hg18
chr16_chainXenTro2	hg18
chr16_chainXenTro2Link	hg18
chr16_est	hg18
chr16_gap	hg18
chr16_gl	hg18
chr16_gold	hg18
chr16_intronEst	hg18
chr16_mrna	hg18
chr16_random_chainAnoCar1	hg18
chr16_random_chainAnoCar1Link	hg18
chr16_random_chainBosTau4	hg18
chr16_random_chainBosTau4Link	hg18
chr16_random_chainBraFlo1	hg18
chr16_random_chainBraFlo1Link	hg18
chr16_random_chainCalJac1	hg18
chr16_random_chainCalJac1Link	hg18
chr16_random_chainCanFam2	hg18
chr16_random_chainCanFam2Link	hg18
chr16_random_chainCavPor3	hg18
chr16_random_chainCavPor3Link	hg18
chr16_random_chainDanRer5	hg18
chr16_random_chainDanRer5Link	hg18
chr16_random_chainEchTel1	hg18
chr16_random_chainEchTel1Link	hg18
chr16_random_chainEquCab1	hg18
chr16_random_chainEquCab1Link	hg18
chr16_random_chainFelCat3	hg18
chr16_random_chainFelCat3Link	hg18
chr16_random_chainFr2	hg18
chr16_random_chainFr2Link	hg18
chr16_random_chainGalGal3	hg18
chr16_random_chainGalGal3Link	hg18
chr16_random_chainGasAcu1	hg18
chr16_random_chainGasAcu1Link	hg18
chr16_random_chainMm9	hg18
chr16_random_chainMm9Link	hg18
chr16_random_chainMonDom4	hg18
chr16_random_chainMonDom4Link	hg18
chr16_random_chainOrnAna1	hg18
chr16_random_chainOrnAna1Link	hg18
chr16_random_chainOryLat2	hg18
chr16_random_chainOryLat2Link	hg18
chr16_random_chainPanTro2	hg18
chr16_random_chainPanTro2Link	hg18
chr16_random_chainPetMar1	hg18
chr16_random_chainPetMar1Link	hg18
chr16_random_chainPonAbe2	hg18
chr16_random_chainPonAbe2Link	hg18
chr16_random_chainRheMac2	hg18
chr16_random_chainRheMac2Link	hg18
chr16_random_chainRn4	hg18
chr16_random_chainRn4Link	hg18
chr16_random_chainStrPur2	hg18
chr16_random_chainStrPur2Link	hg18
chr16_random_chainTaeGut1	hg18
chr16_random_chainTaeGut1Link	hg18
chr16_random_chainTetNig1	hg18
chr16_random_chainTetNig1Link	hg18
chr16_random_chainXenTro2	hg18
chr16_random_chainXenTro2Link	hg18
chr16_random_est	hg18
chr16_random_gap	hg18
chr16_random_gl	hg18
chr16_random_gold	hg18
chr16_random_intronEst	hg18
chr16_random_mrna	hg18
chr16_random_rmsk	hg18
chr16_random_rmskRM327	hg18
chr16_rmsk	hg18
chr16_rmskRM327	hg18
chr17_chainAnoCar1	hg18
chr17_chainAnoCar1Link	hg18
chr17_chainBosTau4	hg18
chr17_chainBosTau4Link	hg18
chr17_chainBraFlo1	hg18
chr17_chainBraFlo1Link	hg18
chr17_chainCalJac1	hg18
chr17_chainCalJac1Link	hg18
chr17_chainCanFam2	hg18
chr17_chainCanFam2Link	hg18
chr17_chainCavPor3	hg18
chr17_chainCavPor3Link	hg18
chr17_chainDanRer5	hg18
chr17_chainDanRer5Link	hg18
chr17_chainEchTel1	hg18
chr17_chainEchTel1Link	hg18
chr17_chainEquCab1	hg18
chr17_chainEquCab1Link	hg18
chr17_chainFelCat3	hg18
chr17_chainFelCat3Link	hg18
chr17_chainFr2	hg18
chr17_chainFr2Link	hg18
chr17_chainGalGal3	hg18
chr17_chainGalGal3Link	hg18
chr17_chainGasAcu1	hg18
chr17_chainGasAcu1Link	hg18
chr17_chainMm9	hg18
chr17_chainMm9Link	hg18
chr17_chainMonDom4	hg18
chr17_chainMonDom4Link	hg18
chr17_chainOrnAna1	hg18
chr17_chainOrnAna1Link	hg18
chr17_chainOryLat2	hg18
chr17_chainOryLat2Link	hg18
chr17_chainPanTro2	hg18
chr17_chainPanTro2Link	hg18
chr17_chainPetMar1	hg18
chr17_chainPetMar1Link	hg18
chr17_chainPonAbe2	hg18
chr17_chainPonAbe2Link	hg18
chr17_chainRheMac2	hg18
chr17_chainRheMac2Link	hg18
chr17_chainRn4	hg18
chr17_chainRn4Link	hg18
chr17_chainSelf	hg18
chr17_chainSelfLink	hg18
chr17_chainStrPur2	hg18
chr17_chainStrPur2Link	hg18
chr17_chainTaeGut1	hg18
chr17_chainTaeGut1Link	hg18
chr17_chainTetNig1	hg18
chr17_chainTetNig1Link	hg18
chr17_chainXenTro2	hg18
chr17_chainXenTro2Link	hg18
chr17_est	hg18
chr17_gap	hg18
chr17_gl	hg18
chr17_gold	hg18
chr17_intronEst	hg18
chr17_mrna	hg18
chr17_random_chainAnoCar1	hg18
chr17_random_chainAnoCar1Link	hg18
chr17_random_chainBosTau4	hg18
chr17_random_chainBosTau4Link	hg18
chr17_random_chainBraFlo1	hg18
chr17_random_chainBraFlo1Link	hg18
chr17_random_chainCalJac1	hg18
chr17_random_chainCalJac1Link	hg18
chr17_random_chainCanFam2	hg18
chr17_random_chainCanFam2Link	hg18
chr17_random_chainCavPor3	hg18
chr17_random_chainCavPor3Link	hg18
chr17_random_chainDanRer5	hg18
chr17_random_chainDanRer5Link	hg18
chr17_random_chainEchTel1	hg18
chr17_random_chainEchTel1Link	hg18
chr17_random_chainEquCab1	hg18
chr17_random_chainEquCab1Link	hg18
chr17_random_chainFelCat3	hg18
chr17_random_chainFelCat3Link	hg18
chr17_random_chainFr2	hg18
chr17_random_chainFr2Link	hg18
chr17_random_chainGalGal3	hg18
chr17_random_chainGalGal3Link	hg18
chr17_random_chainGasAcu1	hg18
chr17_random_chainGasAcu1Link	hg18
chr17_random_chainMm9	hg18
chr17_random_chainMm9Link	hg18
chr17_random_chainMonDom4	hg18
chr17_random_chainMonDom4Link	hg18
chr17_random_chainOrnAna1	hg18
chr17_random_chainOrnAna1Link	hg18
chr17_random_chainOryLat2	hg18
chr17_random_chainOryLat2Link	hg18
chr17_random_chainPanTro2	hg18
chr17_random_chainPanTro2Link	hg18
chr17_random_chainPetMar1	hg18
chr17_random_chainPetMar1Link	hg18
chr17_random_chainPonAbe2	hg18
chr17_random_chainPonAbe2Link	hg18
chr17_random_chainRheMac2	hg18
chr17_random_chainRheMac2Link	hg18
chr17_random_chainRn4	hg18
chr17_random_chainRn4Link	hg18
chr17_random_chainStrPur2	hg18
chr17_random_chainStrPur2Link	hg18
chr17_random_chainTaeGut1	hg18
chr17_random_chainTaeGut1Link	hg18
chr17_random_chainTetNig1	hg18
chr17_random_chainTetNig1Link	hg18
chr17_random_chainXenTro2	hg18
chr17_random_chainXenTro2Link	hg18
chr17_random_est	hg18
chr17_random_gap	hg18
chr17_random_gl	hg18
chr17_random_gold	hg18
chr17_random_intronEst	hg18
chr17_random_mrna	hg18
chr17_random_rmsk	hg18
chr17_random_rmskRM327	hg18
chr17_rmsk	hg18
chr17_rmskRM327	hg18
chr18_chainAnoCar1	hg18
chr18_chainAnoCar1Link	hg18
chr18_chainBosTau4	hg18
chr18_chainBosTau4Link	hg18
chr18_chainBraFlo1	hg18
chr18_chainBraFlo1Link	hg18
chr18_chainCalJac1	hg18
chr18_chainCalJac1Link	hg18
chr18_chainCanFam2	hg18
chr18_chainCanFam2Link	hg18
chr18_chainCavPor3	hg18
chr18_chainCavPor3Link	hg18
chr18_chainDanRer5	hg18
chr18_chainDanRer5Link	hg18
chr18_chainEchTel1	hg18
chr18_chainEchTel1Link	hg18
chr18_chainEquCab1	hg18
chr18_chainEquCab1Link	hg18
chr18_chainFelCat3	hg18
chr18_chainFelCat3Link	hg18
chr18_chainFr2	hg18
chr18_chainFr2Link	hg18
chr18_chainGalGal3	hg18
chr18_chainGalGal3Link	hg18
chr18_chainGasAcu1	hg18
chr18_chainGasAcu1Link	hg18
chr18_chainMm9	hg18
chr18_chainMm9Link	hg18
chr18_chainMonDom4	hg18
chr18_chainMonDom4Link	hg18
chr18_chainOrnAna1	hg18
chr18_chainOrnAna1Link	hg18
chr18_chainOryLat2	hg18
chr18_chainOryLat2Link	hg18
chr18_chainPanTro2	hg18
chr18_chainPanTro2Link	hg18
chr18_chainPetMar1	hg18
chr18_chainPetMar1Link	hg18
chr18_chainPonAbe2	hg18
chr18_chainPonAbe2Link	hg18
chr18_chainRheMac2	hg18
chr18_chainRheMac2Link	hg18
chr18_chainRn4	hg18
chr18_chainRn4Link	hg18
chr18_chainSelf	hg18
chr18_chainSelfLink	hg18
chr18_chainStrPur2	hg18
chr18_chainStrPur2Link	hg18
chr18_chainTaeGut1	hg18
chr18_chainTaeGut1Link	hg18
chr18_chainTetNig1	hg18
chr18_chainTetNig1Link	hg18
chr18_chainXenTro2	hg18
chr18_chainXenTro2Link	hg18
chr18_est	hg18
chr18_gap	hg18
chr18_gl	hg18
chr18_gold	hg18
chr18_intronEst	hg18
chr18_mrna	hg18
chr18_random_chainAnoCar1	hg18
chr18_random_chainAnoCar1Link	hg18
chr18_random_chainBosTau4	hg18
chr18_random_chainBosTau4Link	hg18
chr18_random_chainBraFlo1	hg18
chr18_random_chainBraFlo1Link	hg18
chr18_random_chainCalJac1	hg18
chr18_random_chainCalJac1Link	hg18
chr18_random_chainCanFam2	hg18
chr18_random_chainCanFam2Link	hg18
chr18_random_chainCavPor3	hg18
chr18_random_chainCavPor3Link	hg18
chr18_random_chainDanRer5	hg18
chr18_random_chainDanRer5Link	hg18
chr18_random_chainEchTel1	hg18
chr18_random_chainEchTel1Link	hg18
chr18_random_chainEquCab1	hg18
chr18_random_chainEquCab1Link	hg18
chr18_random_chainFelCat3	hg18
chr18_random_chainFelCat3Link	hg18
chr18_random_chainFr2	hg18
chr18_random_chainFr2Link	hg18
chr18_random_chainGalGal3	hg18
chr18_random_chainGalGal3Link	hg18
chr18_random_chainGasAcu1	hg18
chr18_random_chainGasAcu1Link	hg18
chr18_random_chainMm9	hg18
chr18_random_chainMm9Link	hg18
chr18_random_chainMonDom4	hg18
chr18_random_chainMonDom4Link	hg18
chr18_random_chainOrnAna1	hg18
chr18_random_chainOrnAna1Link	hg18
chr18_random_chainOryLat2	hg18
chr18_random_chainOryLat2Link	hg18
chr18_random_chainPanTro2	hg18
chr18_random_chainPanTro2Link	hg18
chr18_random_chainPetMar1	hg18
chr18_random_chainPetMar1Link	hg18
chr18_random_chainPonAbe2	hg18
chr18_random_chainPonAbe2Link	hg18
chr18_random_chainRheMac2	hg18
chr18_random_chainRheMac2Link	hg18
chr18_random_chainRn4	hg18
chr18_random_chainRn4Link	hg18
chr18_random_chainStrPur2	hg18
chr18_random_chainStrPur2Link	hg18
chr18_random_chainTaeGut1	hg18
chr18_random_chainTaeGut1Link	hg18
chr18_random_chainTetNig1	hg18
chr18_random_chainTetNig1Link	hg18
chr18_random_chainXenTro2	hg18
chr18_random_chainXenTro2Link	hg18
chr18_random_est	hg18
chr18_random_gap	hg18
chr18_random_gl	hg18
chr18_random_gold	hg18
chr18_random_intronEst	hg18
chr18_random_mrna	hg18
chr18_random_rmsk	hg18
chr18_random_rmskRM327	hg18
chr18_rmsk	hg18
chr18_rmskRM327	hg18
chr19_chainAnoCar1	hg18
chr19_chainAnoCar1Link	hg18
chr19_chainBosTau4	hg18
chr19_chainBosTau4Link	hg18
chr19_chainBraFlo1	hg18
chr19_chainBraFlo1Link	hg18
chr19_chainCalJac1	hg18
chr19_chainCalJac1Link	hg18
chr19_chainCanFam2	hg18
chr19_chainCanFam2Link	hg18
chr19_chainCavPor3	hg18
chr19_chainCavPor3Link	hg18
chr19_chainDanRer5	hg18
chr19_chainDanRer5Link	hg18
chr19_chainEchTel1	hg18
chr19_chainEchTel1Link	hg18
chr19_chainEquCab1	hg18
chr19_chainEquCab1Link	hg18
chr19_chainFelCat3	hg18
chr19_chainFelCat3Link	hg18
chr19_chainFr2	hg18
chr19_chainFr2Link	hg18
chr19_chainGalGal3	hg18
chr19_chainGalGal3Link	hg18
chr19_chainGasAcu1	hg18
chr19_chainGasAcu1Link	hg18
chr19_chainMm9	hg18
chr19_chainMm9Link	hg18
chr19_chainMonDom4	hg18
chr19_chainMonDom4Link	hg18
chr19_chainOrnAna1	hg18
chr19_chainOrnAna1Link	hg18
chr19_chainOryLat2	hg18
chr19_chainOryLat2Link	hg18
chr19_chainPanTro2	hg18
chr19_chainPanTro2Link	hg18
chr19_chainPetMar1	hg18
chr19_chainPetMar1Link	hg18
chr19_chainPonAbe2	hg18
chr19_chainPonAbe2Link	hg18
chr19_chainRheMac2	hg18
chr19_chainRheMac2Link	hg18
chr19_chainRn4	hg18
chr19_chainRn4Link	hg18
chr19_chainSelf	hg18
chr19_chainSelfLink	hg18
chr19_chainStrPur2	hg18
chr19_chainStrPur2Link	hg18
chr19_chainTaeGut1	hg18
chr19_chainTaeGut1Link	hg18
chr19_chainTetNig1	hg18
chr19_chainTetNig1Link	hg18
chr19_chainXenTro2	hg18
chr19_chainXenTro2Link	hg18
chr19_est	hg18
chr19_gap	hg18
chr19_gl	hg18
chr19_gold	hg18
chr19_intronEst	hg18
chr19_mrna	hg18
chr19_random_chainAnoCar1	hg18
chr19_random_chainAnoCar1Link	hg18
chr19_random_chainBosTau4	hg18
chr19_random_chainBosTau4Link	hg18
chr19_random_chainBraFlo1	hg18
chr19_random_chainBraFlo1Link	hg18
chr19_random_chainCalJac1	hg18
chr19_random_chainCalJac1Link	hg18
chr19_random_chainCanFam2	hg18
chr19_random_chainCanFam2Link	hg18
chr19_random_chainCavPor3	hg18
chr19_random_chainCavPor3Link	hg18
chr19_random_chainDanRer5	hg18
chr19_random_chainDanRer5Link	hg18
chr19_random_chainEchTel1	hg18
chr19_random_chainEchTel1Link	hg18
chr19_random_chainEquCab1	hg18
chr19_random_chainEquCab1Link	hg18
chr19_random_chainFelCat3	hg18
chr19_random_chainFelCat3Link	hg18
chr19_random_chainFr2	hg18
chr19_random_chainFr2Link	hg18
chr19_random_chainGalGal3	hg18
chr19_random_chainGalGal3Link	hg18
chr19_random_chainGasAcu1	hg18
chr19_random_chainGasAcu1Link	hg18
chr19_random_chainMm9	hg18
chr19_random_chainMm9Link	hg18
chr19_random_chainMonDom4	hg18
chr19_random_chainMonDom4Link	hg18
chr19_random_chainOrnAna1	hg18
chr19_random_chainOrnAna1Link	hg18
chr19_random_chainOryLat2	hg18
chr19_random_chainOryLat2Link	hg18
chr19_random_chainPanTro2	hg18
chr19_random_chainPanTro2Link	hg18
chr19_random_chainPetMar1	hg18
chr19_random_chainPetMar1Link	hg18
chr19_random_chainPonAbe2	hg18
chr19_random_chainPonAbe2Link	hg18
chr19_random_chainRheMac2	hg18
chr19_random_chainRheMac2Link	hg18
chr19_random_chainRn4	hg18
chr19_random_chainRn4Link	hg18
chr19_random_chainStrPur2	hg18
chr19_random_chainStrPur2Link	hg18
chr19_random_chainTaeGut1	hg18
chr19_random_chainTaeGut1Link	hg18
chr19_random_chainTetNig1	hg18
chr19_random_chainTetNig1Link	hg18
chr19_random_chainXenTro2	hg18
chr19_random_chainXenTro2Link	hg18
chr19_random_est	hg18
chr19_random_gap	hg18
chr19_random_gl	hg18
chr19_random_gold	hg18
chr19_random_intronEst	hg18
chr19_random_mrna	hg18
chr19_random_rmsk	hg18
chr19_random_rmskRM327	hg18
chr19_rmsk	hg18
chr19_rmskRM327	hg18
chr2_chainAnoCar1	hg18
chr2_chainAnoCar1Link	hg18
chr2_chainBosTau4	hg18
chr2_chainBosTau4Link	hg18
chr2_chainBraFlo1	hg18
chr2_chainBraFlo1Link	hg18
chr2_chainCalJac1	hg18
chr2_chainCalJac1Link	hg18
chr2_chainCanFam2	hg18
chr2_chainCanFam2Link	hg18
chr2_chainCavPor3	hg18
chr2_chainCavPor3Link	hg18
chr2_chainDanRer5	hg18
chr2_chainDanRer5Link	hg18
chr2_chainEchTel1	hg18
chr2_chainEchTel1Link	hg18
chr2_chainEquCab1	hg18
chr2_chainEquCab1Link	hg18
chr2_chainFelCat3	hg18
chr2_chainFelCat3Link	hg18
chr2_chainFr2	hg18
chr2_chainFr2Link	hg18
chr2_chainGalGal3	hg18
chr2_chainGalGal3Link	hg18
chr2_chainGasAcu1	hg18
chr2_chainGasAcu1Link	hg18
chr2_chainMm9	hg18
chr2_chainMm9Link	hg18
chr2_chainMonDom4	hg18
chr2_chainMonDom4Link	hg18
chr2_chainOrnAna1	hg18
chr2_chainOrnAna1Link	hg18
chr2_chainOryLat2	hg18
chr2_chainOryLat2Link	hg18
chr2_chainPanTro2	hg18
chr2_chainPanTro2Link	hg18
chr2_chainPetMar1	hg18
chr2_chainPetMar1Link	hg18
chr2_chainPonAbe2	hg18
chr2_chainPonAbe2Link	hg18
chr2_chainRheMac2	hg18
chr2_chainRheMac2Link	hg18
chr2_chainRn4	hg18
chr2_chainRn4Link	hg18
chr2_chainSelf	hg18
chr2_chainSelfLink	hg18
chr2_chainStrPur2	hg18
chr2_chainStrPur2Link	hg18
chr2_chainTaeGut1	hg18
chr2_chainTaeGut1Link	hg18
chr2_chainTetNig1	hg18
chr2_chainTetNig1Link	hg18
chr2_chainXenTro2	hg18
chr2_chainXenTro2Link	hg18
chr2_est	hg18
chr2_gap	hg18
chr2_gl	hg18
chr2_gold	hg18
chr2_intronEst	hg18
chr2_mrna	hg18
chr2_random_chainAnoCar1	hg18
chr2_random_chainAnoCar1Link	hg18
chr2_random_chainBosTau4	hg18
chr2_random_chainBosTau4Link	hg18
chr2_random_chainBraFlo1	hg18
chr2_random_chainBraFlo1Link	hg18
chr2_random_chainCalJac1	hg18
chr2_random_chainCalJac1Link	hg18
chr2_random_chainCanFam2	hg18
chr2_random_chainCanFam2Link	hg18
chr2_random_chainCavPor3	hg18
chr2_random_chainCavPor3Link	hg18
chr2_random_chainDanRer5	hg18
chr2_random_chainDanRer5Link	hg18
chr2_random_chainEchTel1	hg18
chr2_random_chainEchTel1Link	hg18
chr2_random_chainEquCab1	hg18
chr2_random_chainEquCab1Link	hg18
chr2_random_chainFelCat3	hg18
chr2_random_chainFelCat3Link	hg18
chr2_random_chainFr2	hg18
chr2_random_chainFr2Link	hg18
chr2_random_chainGalGal3	hg18
chr2_random_chainGalGal3Link	hg18
chr2_random_chainGasAcu1	hg18
chr2_random_chainGasAcu1Link	hg18
chr2_random_chainMm9	hg18
chr2_random_chainMm9Link	hg18
chr2_random_chainMonDom4	hg18
chr2_random_chainMonDom4Link	hg18
chr2_random_chainOrnAna1	hg18
chr2_random_chainOrnAna1Link	hg18
chr2_random_chainOryLat2	hg18
chr2_random_chainOryLat2Link	hg18
chr2_random_chainPanTro2	hg18
chr2_random_chainPanTro2Link	hg18
chr2_random_chainPetMar1	hg18
chr2_random_chainPetMar1Link	hg18
chr2_random_chainPonAbe2	hg18
chr2_random_chainPonAbe2Link	hg18
chr2_random_chainRheMac2	hg18
chr2_random_chainRheMac2Link	hg18
chr2_random_chainRn4	hg18
chr2_random_chainRn4Link	hg18
chr2_random_chainStrPur2	hg18
chr2_random_chainStrPur2Link	hg18
chr2_random_chainTaeGut1	hg18
chr2_random_chainTaeGut1Link	hg18
chr2_random_chainTetNig1	hg18
chr2_random_chainTetNig1Link	hg18
chr2_random_chainXenTro2	hg18
chr2_random_chainXenTro2Link	hg18
chr2_random_est	hg18
chr2_random_gap	hg18
chr2_random_gl	hg18
chr2_random_gold	hg18
chr2_random_intronEst	hg18
chr2_random_mrna	hg18
chr2_random_rmsk	hg18
chr2_random_rmskRM327	hg18
chr2_rmsk	hg18
chr2_rmskRM327	hg18
chr20_chainAnoCar1	hg18
chr20_chainAnoCar1Link	hg18
chr20_chainBosTau4	hg18
chr20_chainBosTau4Link	hg18
chr20_chainBraFlo1	hg18
chr20_chainBraFlo1Link	hg18
chr20_chainCalJac1	hg18
chr20_chainCalJac1Link	hg18
chr20_chainCanFam2	hg18
chr20_chainCanFam2Link	hg18
chr20_chainCavPor3	hg18
chr20_chainCavPor3Link	hg18
chr20_chainDanRer5	hg18
chr20_chainDanRer5Link	hg18
chr20_chainEchTel1	hg18
chr20_chainEchTel1Link	hg18
chr20_chainEquCab1	hg18
chr20_chainEquCab1Link	hg18
chr20_chainFelCat3	hg18
chr20_chainFelCat3Link	hg18
chr20_chainFr2	hg18
chr20_chainFr2Link	hg18
chr20_chainGalGal3	hg18
chr20_chainGalGal3Link	hg18
chr20_chainGasAcu1	hg18
chr20_chainGasAcu1Link	hg18
chr20_chainMm9	hg18
chr20_chainMm9Link	hg18
chr20_chainMonDom4	hg18
chr20_chainMonDom4Link	hg18
chr20_chainOrnAna1	hg18
chr20_chainOrnAna1Link	hg18
chr20_chainOryLat2	hg18
chr20_chainOryLat2Link	hg18
chr20_chainPanTro2	hg18
chr20_chainPanTro2Link	hg18
chr20_chainPetMar1	hg18
chr20_chainPetMar1Link	hg18
chr20_chainPonAbe2	hg18
chr20_chainPonAbe2Link	hg18
chr20_chainRheMac2	hg18
chr20_chainRheMac2Link	hg18
chr20_chainRn4	hg18
chr20_chainRn4Link	hg18
chr20_chainSelf	hg18
chr20_chainSelfLink	hg18
chr20_chainStrPur2	hg18
chr20_chainStrPur2Link	hg18
chr20_chainTaeGut1	hg18
chr20_chainTaeGut1Link	hg18
chr20_chainTetNig1	hg18
chr20_chainTetNig1Link	hg18
chr20_chainXenTro2	hg18
chr20_chainXenTro2Link	hg18
chr20_est	hg18
chr20_gap	hg18
chr20_gl	hg18
chr20_gold	hg18
chr20_intronEst	hg18
chr20_mrna	hg18
chr20_rmsk	hg18
chr20_rmskRM327	hg18
chr21_chainAnoCar1	hg18
chr21_chainAnoCar1Link	hg18
chr21_chainBosTau4	hg18
chr21_chainBosTau4Link	hg18
chr21_chainBraFlo1	hg18
chr21_chainBraFlo1Link	hg18
chr21_chainCalJac1	hg18
chr21_chainCalJac1Link	hg18
chr21_chainCanFam2	hg18
chr21_chainCanFam2Link	hg18
chr21_chainCavPor3	hg18
chr21_chainCavPor3Link	hg18
chr21_chainDanRer5	hg18
chr21_chainDanRer5Link	hg18
chr21_chainEchTel1	hg18
chr21_chainEchTel1Link	hg18
chr21_chainEquCab1	hg18
chr21_chainEquCab1Link	hg18
chr21_chainFelCat3	hg18
chr21_chainFelCat3Link	hg18
chr21_chainFr2	hg18
chr21_chainFr2Link	hg18
chr21_chainGalGal3	hg18
chr21_chainGalGal3Link	hg18
chr21_chainGasAcu1	hg18
chr21_chainGasAcu1Link	hg18
chr21_chainMm9	hg18
chr21_chainMm9Link	hg18
chr21_chainMonDom4	hg18
chr21_chainMonDom4Link	hg18
chr21_chainOrnAna1	hg18
chr21_chainOrnAna1Link	hg18
chr21_chainOryLat2	hg18
chr21_chainOryLat2Link	hg18
chr21_chainPanTro2	hg18
chr21_chainPanTro2Link	hg18
chr21_chainPetMar1	hg18
chr21_chainPetMar1Link	hg18
chr21_chainPonAbe2	hg18
chr21_chainPonAbe2Link	hg18
chr21_chainRheMac2	hg18
chr21_chainRheMac2Link	hg18
chr21_chainRn4	hg18
chr21_chainRn4Link	hg18
chr21_chainSelf	hg18
chr21_chainSelfLink	hg18
chr21_chainStrPur2	hg18
chr21_chainStrPur2Link	hg18
chr21_chainTaeGut1	hg18
chr21_chainTaeGut1Link	hg18
chr21_chainTetNig1	hg18
chr21_chainTetNig1Link	hg18
chr21_chainXenTro2	hg18
chr21_chainXenTro2Link	hg18
chr21_est	hg18
chr21_gap	hg18
chr21_gl	hg18
chr21_gold	hg18
chr21_intronEst	hg18
chr21_mrna	hg18
chr21_random_chainAnoCar1	hg18
chr21_random_chainAnoCar1Link	hg18
chr21_random_chainBosTau4	hg18
chr21_random_chainBosTau4Link	hg18
chr21_random_chainBraFlo1	hg18
chr21_random_chainBraFlo1Link	hg18
chr21_random_chainCalJac1	hg18
chr21_random_chainCalJac1Link	hg18
chr21_random_chainCanFam2	hg18
chr21_random_chainCanFam2Link	hg18
chr21_random_chainCavPor3	hg18
chr21_random_chainCavPor3Link	hg18
chr21_random_chainDanRer5	hg18
chr21_random_chainDanRer5Link	hg18
chr21_random_chainEchTel1	hg18
chr21_random_chainEchTel1Link	hg18
chr21_random_chainEquCab1	hg18
chr21_random_chainEquCab1Link	hg18
chr21_random_chainFelCat3	hg18
chr21_random_chainFelCat3Link	hg18
chr21_random_chainFr2	hg18
chr21_random_chainFr2Link	hg18
chr21_random_chainGalGal3	hg18
chr21_random_chainGalGal3Link	hg18
chr21_random_chainGasAcu1	hg18
chr21_random_chainGasAcu1Link	hg18
chr21_random_chainMm9	hg18
chr21_random_chainMm9Link	hg18
chr21_random_chainMonDom4	hg18
chr21_random_chainMonDom4Link	hg18
chr21_random_chainOrnAna1	hg18
chr21_random_chainOrnAna1Link	hg18
chr21_random_chainOryLat2	hg18
chr21_random_chainOryLat2Link	hg18
chr21_random_chainPanTro2	hg18
chr21_random_chainPanTro2Link	hg18
chr21_random_chainPetMar1	hg18
chr21_random_chainPetMar1Link	hg18
chr21_random_chainPonAbe2	hg18
chr21_random_chainPonAbe2Link	hg18
chr21_random_chainRheMac2	hg18
chr21_random_chainRheMac2Link	hg18
chr21_random_chainRn4	hg18
chr21_random_chainRn4Link	hg18
chr21_random_chainStrPur2	hg18
chr21_random_chainStrPur2Link	hg18
chr21_random_chainTaeGut1	hg18
chr21_random_chainTaeGut1Link	hg18
chr21_random_chainTetNig1	hg18
chr21_random_chainTetNig1Link	hg18
chr21_random_chainXenTro2	hg18
chr21_random_chainXenTro2Link	hg18
chr21_random_est	hg18
chr21_random_gap	hg18
chr21_random_gl	hg18
chr21_random_gold	hg18
chr21_random_intronEst	hg18
chr21_random_mrna	hg18
chr21_random_rmsk	hg18
chr21_random_rmskRM327	hg18
chr21_rmsk	hg18
chr21_rmskRM327	hg18
chr22_chainAnoCar1	hg18
chr22_chainAnoCar1Link	hg18
chr22_chainBosTau4	hg18
chr22_chainBosTau4Link	hg18
chr22_chainBraFlo1	hg18
chr22_chainBraFlo1Link	hg18
chr22_chainCalJac1	hg18
chr22_chainCalJac1Link	hg18
chr22_chainCanFam2	hg18
chr22_chainCanFam2Link	hg18
chr22_chainCavPor3	hg18
chr22_chainCavPor3Link	hg18
chr22_chainDanRer5	hg18
chr22_chainDanRer5Link	hg18
chr22_chainEchTel1	hg18
chr22_chainEchTel1Link	hg18
chr22_chainEquCab1	hg18
chr22_chainEquCab1Link	hg18
chr22_chainFelCat3	hg18
chr22_chainFelCat3Link	hg18
chr22_chainFr2	hg18
chr22_chainFr2Link	hg18
chr22_chainGalGal3	hg18
chr22_chainGalGal3Link	hg18
chr22_chainGasAcu1	hg18
chr22_chainGasAcu1Link	hg18
chr22_chainMm9	hg18
chr22_chainMm9Link	hg18
chr22_chainMonDom4	hg18
chr22_chainMonDom4Link	hg18
chr22_chainOrnAna1	hg18
chr22_chainOrnAna1Link	hg18
chr22_chainOryLat2	hg18
chr22_chainOryLat2Link	hg18
chr22_chainPanTro2	hg18
chr22_chainPanTro2Link	hg18
chr22_chainPetMar1	hg18
chr22_chainPetMar1Link	hg18
chr22_chainPonAbe2	hg18
chr22_chainPonAbe2Link	hg18
chr22_chainRheMac2	hg18
chr22_chainRheMac2Link	hg18
chr22_chainRn4	hg18
chr22_chainRn4Link	hg18
chr22_chainSelf	hg18
chr22_chainSelfLink	hg18
chr22_chainStrPur2	hg18
chr22_chainStrPur2Link	hg18
chr22_chainTaeGut1	hg18
chr22_chainTaeGut1Link	hg18
chr22_chainTetNig1	hg18
chr22_chainTetNig1Link	hg18
chr22_chainXenTro2	hg18
chr22_chainXenTro2Link	hg18
chr22_est	hg18
chr22_gap	hg18
chr22_gl	hg18
chr22_gold	hg18
chr22_h2_hap1_chainAnoCar1	hg18
chr22_h2_hap1_chainAnoCar1Link	hg18
chr22_h2_hap1_chainBosTau4	hg18
chr22_h2_hap1_chainBosTau4Link	hg18
chr22_h2_hap1_chainBraFlo1	hg18
chr22_h2_hap1_chainBraFlo1Link	hg18
chr22_h2_hap1_chainCalJac1	hg18
chr22_h2_hap1_chainCalJac1Link	hg18
chr22_h2_hap1_chainCanFam2	hg18
chr22_h2_hap1_chainCanFam2Link	hg18
chr22_h2_hap1_chainCavPor3	hg18
chr22_h2_hap1_chainCavPor3Link	hg18
chr22_h2_hap1_chainDanRer5	hg18
chr22_h2_hap1_chainDanRer5Link	hg18
chr22_h2_hap1_chainEchTel1	hg18
chr22_h2_hap1_chainEchTel1Link	hg18
chr22_h2_hap1_chainEquCab1	hg18
chr22_h2_hap1_chainEquCab1Link	hg18
chr22_h2_hap1_chainFelCat3	hg18
chr22_h2_hap1_chainFelCat3Link	hg18
chr22_h2_hap1_chainFr2	hg18
chr22_h2_hap1_chainFr2Link	hg18
chr22_h2_hap1_chainGalGal3	hg18
chr22_h2_hap1_chainGalGal3Link	hg18
chr22_h2_hap1_chainGasAcu1	hg18
chr22_h2_hap1_chainGasAcu1Link	hg18
chr22_h2_hap1_chainMm9	hg18
chr22_h2_hap1_chainMm9Link	hg18
chr22_h2_hap1_chainMonDom4	hg18
chr22_h2_hap1_chainMonDom4Link	hg18
chr22_h2_hap1_chainOrnAna1	hg18
chr22_h2_hap1_chainOrnAna1Link	hg18
chr22_h2_hap1_chainOryLat2	hg18
chr22_h2_hap1_chainOryLat2Link	hg18
chr22_h2_hap1_chainPanTro2	hg18
chr22_h2_hap1_chainPanTro2Link	hg18
chr22_h2_hap1_chainPetMar1	hg18
chr22_h2_hap1_chainPetMar1Link	hg18
chr22_h2_hap1_chainPonAbe2	hg18
chr22_h2_hap1_chainPonAbe2Link	hg18
chr22_h2_hap1_chainRheMac2	hg18
chr22_h2_hap1_chainRheMac2Link	hg18
chr22_h2_hap1_chainRn4	hg18
chr22_h2_hap1_chainRn4Link	hg18
chr22_h2_hap1_chainStrPur2	hg18
chr22_h2_hap1_chainStrPur2Link	hg18
chr22_h2_hap1_chainTaeGut1	hg18
chr22_h2_hap1_chainTaeGut1Link	hg18
chr22_h2_hap1_chainTetNig1	hg18
chr22_h2_hap1_chainTetNig1Link	hg18
chr22_h2_hap1_chainXenTro2	hg18
chr22_h2_hap1_chainXenTro2Link	hg18
chr22_h2_hap1_est	hg18
chr22_h2_hap1_gap	hg18
chr22_h2_hap1_gl	hg18
chr22_h2_hap1_gold	hg18
chr22_h2_hap1_intronEst	hg18
chr22_h2_hap1_mrna	hg18
chr22_h2_hap1_rmsk	hg18
chr22_h2_hap1_rmskRM327	hg18
chr22_intronEst	hg18
chr22_mrna	hg18
chr22_random_chainAnoCar1	hg18
chr22_random_chainAnoCar1Link	hg18
chr22_random_chainBosTau4	hg18
chr22_random_chainBosTau4Link	hg18
chr22_random_chainBraFlo1	hg18
chr22_random_chainBraFlo1Link	hg18
chr22_random_chainCalJac1	hg18
chr22_random_chainCalJac1Link	hg18
chr22_random_chainCanFam2	hg18
chr22_random_chainCanFam2Link	hg18
chr22_random_chainCavPor3	hg18
chr22_random_chainCavPor3Link	hg18
chr22_random_chainDanRer5	hg18
chr22_random_chainDanRer5Link	hg18
chr22_random_chainEchTel1	hg18
chr22_random_chainEchTel1Link	hg18
chr22_random_chainEquCab1	hg18
chr22_random_chainEquCab1Link	hg18
chr22_random_chainFelCat3	hg18
chr22_random_chainFelCat3Link	hg18
chr22_random_chainFr2	hg18
chr22_random_chainFr2Link	hg18
chr22_random_chainGalGal3	hg18
chr22_random_chainGalGal3Link	hg18
chr22_random_chainGasAcu1	hg18
chr22_random_chainGasAcu1Link	hg18
chr22_random_chainMm9	hg18
chr22_random_chainMm9Link	hg18
chr22_random_chainMonDom4	hg18
chr22_random_chainMonDom4Link	hg18
chr22_random_chainOrnAna1	hg18
chr22_random_chainOrnAna1Link	hg18
chr22_random_chainOryLat2	hg18
chr22_random_chainOryLat2Link	hg18
chr22_random_chainPanTro2	hg18
chr22_random_chainPanTro2Link	hg18
chr22_random_chainPetMar1	hg18
chr22_random_chainPetMar1Link	hg18
chr22_random_chainPonAbe2	hg18
chr22_random_chainPonAbe2Link	hg18
chr22_random_chainRheMac2	hg18
chr22_random_chainRheMac2Link	hg18
[truncated: 2,997 more rows]
